# Supplementary material for: Second-generation molecular subgrouping of medulloblastoma: an international meta-analysis of Group 3 and Group 4 subtypes
Source: PubMed Central journal article supplement (PMC6660496; doi:10.1007/s00401-019-02020-0), 2019-05-10
Supplement: 401_2019_2020_MOESM1_ESM.pdf [file 401_2019_2020_MOESM1_ESM.pdf]

# Second-generation molecular subgrouping of medulloblastoma: an international meta-analysis of Group 3 and Group 4 subtypes

T Sharma, E C Schwalbe et al.

## Appendix

### Supplementary Methods

We undertook a retrospective, integrative analysis of Grp3/4 substructure from three published component studies [1-3], whose respective major findings are summarized in figure 1. Quality control checks revealed no biases attributable to sample type (*i.e.* fresh frozen vs formalin-fixed, paraffin embedded derivatives), array type (450k vs 850k), or source study/institution (supplementary Figure 3). 69 previously published samples were removed due to low methylation classifier prediction scores [4] and 80 samples were additionally removed due to shared genotypes (*i.e.* duplicate samples/patients). 28 samples were removed due to a 'non-MB' prediction by the methylation classifier (supplementary Tables 1 and 2; supplementary Figure 2. The cohorts and their demographics are summarized in Table 1.

#### *MB classifier*

Before training the classifier, a correction for the type of material tissue (FFPE or frozen) and array (450k or EPIC) was performed by fitting a linear model to the log<sub>2</sub>-transformed intensity values (`removeBatchEffect` function, `limma` package v.3.36 [5] including the material tissue and array type as factor variables. The methylated and unmethylated signals were corrected individually. Estimated batch effects were also used to adjust diagnostic samples or test samples within the cross-validation. Beta values were calculated from the retransformed intensities using an offset of 100 (as recommended by Illumina).

To train the RF classifier, the `randomForest` R package [6] was used. For feature selection, the 50,000 CpG probes with highest SD were selected. In a second step, an RF was trained to calculate a RF permutation-based variable importance measure for the selected CpG probes. Finally, the 10,000 CpG probes with highest variable importance were used to train the final RF model. For both RF models 5,000 trees were fitted and imbalanced class sizes were accounted for by down-sampling to the minority class; this ensures an identical number of samples per class and tree [7]. The performance of the RF model was validated by a threefold cross-validation, validating in each fold all steps of the classifier development, starting with the batch adjustment.

The classification scores generated by the RF model (that is, the proportion of trees voting for a class) perform already well when used to predict the correct Grp3/4 subtype, but they do not reflect well calibrated class probabilities that may guide clinical decision making [6]. Furthermore, the distribution of the RF scores may vary between classes, which make inter-class comparisons difficult. To obtain scores that are comparable between classes and that are improved estimates of the certainty of individual predictions, we performed a classification score recalibration by mapping the original scores to more accurate class probabilities[8]. To find such a mapping, an L<sub>2</sub>-penalized, multinomial, logistic regression model was fitted, which takes the methylation class as response variable and the RF scores as explanatory variables. The R package `glmnet` [9] was used to fit this model. In addition, the model was fitted by incorporating a small ridge-penalty (L<sub>2</sub>) on the likelihood to prevent overfitting, as well as to stabilize estimation in situations in which classes are perfectly separable. The amount of this regularization, that is, the penalization parameter, is determined by running a tenfold cross-validation and choosing penalization parameter that minimizes the mean squared error (MSE). Independent RF scores are needed to fit this model, that is, the scores need to be generated by a RF classifier that was not trained using the same samples, otherwise the RF scores will be systematically biased and not comparable to scores of unseen cases. As such, RF scores generated by the threefold cross-validation are used. To validate the class predictions generated by using the recalibrated scores of the calibration model, an additional, nested threefold cross-validation loop is incorporated into the main threefold cross-validation. Within each

cross-validation run this nested threefold cross-validation is applied to generate independent RF scores, which are then used to train a calibration model. The predicted RF scores resulting from predicting the one-third test data of the outer cross-validation loop are then recalibrated by applying the calibration model that was fitted on the RF scores generated on the other two-third of the data by the nested cross-validation. Performances of the resulting classifier predictions and scores generated by the cross-validation were assessed by the misclassification error, multiclass area under receiver operating characteristic (ROC) curve (AUC) and the multiclass Brier score. The misclassification error measures the frequency of falsely assigned class labels when using the maximum of the RF scores or re-calibrated scores as a cutoff to determine the predicted class, that is, the majority vote. To measure the AUC for our multiclass RF the generalization of the AUC for multiclass classification problems[10] was used. To measure how well the resulting RF scores and recalibrated scores perform when used as class probabilities, the multiclass Brier score was used [11,12].

## References:

- 1 Cavalli FMG, Remke M, Rampasek L, Peacock J, Shih DJH, Luu B et al. (2017) Intertumoral Heterogeneity within Medulloblastoma Subgroups. *Cancer Cell* 31: 737-754 e736
- 2 Northcott PA, Buchhalter I, Morrissy AS, Hovestadt V, Weischenfeldt J, Ehrenberger T et al. (2017) The whole-genome landscape of medulloblastoma subtypes. *Nature* 547: 311-317
- 3 Schwalbe EC, Lindsey JC, Nakjang S, Crosier S, Smith AJ, Hicks D et al. (2017) Novel molecular subgroups for clinical classification and outcome prediction in childhood medulloblastoma: a cohort study. *Lancet Oncol* 18: 958-971
- 4 Capper D, Jones DTW, Sill M, Hovestadt V, Schrimpf D, Sturm D et al. (2018) DNA methylation-based classification of central nervous system tumours. *Nature* 555: 469-474
- 5 Ritchie ME, Phipson B, Wu D, Hu Y, Law CW, Shi W, Smyth GK (2015) limma powers differential expression analyses for RNA-sequencing and microarray studies. *Nucleic Acids Res* 43: e47
- 6 Simon R (2014) Class probability estimation for medical studies. *Biom J* 56: 597-600
- 7 Chen CL, A.; Breiman, L. (2004) Report 666: Using Random Forest to Learn Imbalanced Data. City
- 8 Bostrom H (2008) Calibrating Random Forests. City
- 9 Friedman J, Hastie T, Tibshirani R (2010) Regularization Paths for Generalized Linear Models via Coordinate Descent. *J Stat Softw* 33: 1-22
- 10 Hand DJ, Till RJ (2001) A simple generalisation of the area under the ROC curve for multiple class classification problems. *Machine Learning* 45: 171-186
- 11 Brier GW (1950) Verification of Forecasts Expressed in Terms of Probability. *Monthly Weather Review* 78: 1-3
- 12 Kim KI, Simon R (2014) Overfitting, generalization, and MSE in class probability estimation with high-dimensional data. *Biom J* 56: 256-269

| Idat                      | Study_ID                     | Derivative Material | Array | Study     | Prediction | Score |
|---------------------------|------------------------------|---------------------|-------|-----------|------------|-------|
| 200788260028_R06C01       | 93622                        | FFPE                | EPIC  | Northcott | MB, G4     | 0.179 |
| 200397860036_R06C01       | P036_90802_diag              | Fresh-frozen        | 450k  | Northcott | MB, G3     | 0.085 |
| 200784530098_R06C01       | P036_93530_diag              | FFPE                | EPIC  | Northcott | MB, G3     | 0.449 |
| 7970376085_R02C01         | TO_MB10                      | Fresh-frozen        | 450k  | Northcott | MB, G3     | 0.829 |
| 7970376048_R01C01         | TO_MB1                       | Fresh-frozen        | 450k  | Northcott | MB, G3     | 0.829 |
| 7810920080_R04C01         | TO_MB33                      | Fresh-frozen        | 450k  | Northcott | MB, G3     | 0.368 |
| 7970376149_R04C01         | TO_MB5                       | Fresh-frozen        | 450k  | Northcott | MB, G3     | 0.705 |
| 7973219019_R04C02         | MB-0580                      | Fresh-frozen        | 450k  | Northcott | MB, G4     | 0.787 |
| 8942326039_R01C02         | MB-2631                      | Fresh-frozen        | 450k  | Northcott | MB, G3     | 0.633 |
| 7970376151_R01C01         | MB-MT1179                    | Fresh-frozen        | 450k  | Northcott | MB, G3     | 0.877 |
| 7796806110_R01C01         | MB-MT314                     | Fresh-frozen        | 450k  | Northcott | MB, G3     | 0.695 |
| 7810920068_R02C01         | ID_7810920068_R02C01         | Fresh-frozen        | 450k  | Cavalli   | MB, G4     | 0.688 |
| 7810920071_R01C01         | ID_7810920071_R01C01         | Fresh-frozen        | 450k  | Cavalli   | MB, G4     | 0.898 |
| 7810920078_R05C02         | ID_7810920078_R05C02         | Fresh-frozen        | 450k  | Cavalli   | MB, G4     | 0.661 |
| 7810920079_R05C01         | ID_7810920079_R05C01         | Fresh-frozen        | 450k  | Cavalli   | MB, G4     | 0.818 |
| 7970368003_R01C01         | ID_7970368003_R01C01         | Fresh-frozen        | 450k  | Cavalli   | MB, G3     | 0.818 |
| 7970368007_R02C01         | ID_7970368007_R02C01         | Fresh-frozen        | 450k  | Cavalli   | MB, G4     | 0.877 |
| 7970368045_R06C02         | ID_7970368045_R06C02         | Fresh-frozen        | 450k  | Cavalli   | MB, G4     | 0.897 |
| 7970368069_R04C01         | ID_7970368069_R04C01         | Fresh-frozen        | 450k  | Cavalli   | MB, G3     | 0.769 |
| 7970368130_R04C02         | ID_7970368130_R04C02         | Fresh-frozen        | 450k  | Cavalli   | MB, G4     | 0.776 |
| 7970376002_R04C01         | ID_7970376002_R04C01         | Fresh-frozen        | 450k  | Cavalli   | MB, G4     | 0.871 |
| 7970376148_R02C01         | ID_7970376148_R02C01         | Fresh-frozen        | 450k  | Cavalli   | MB, G4     | 0.737 |
| 7973201069_R04C02         | ID_7973201069_R04C02         | Fresh-frozen        | 450k  | Cavalli   | MB, G4     | 0.670 |
| 7973201149_R04C01         | ID_7973201149_R04C01         | Fresh-frozen        | 450k  | Cavalli   | MB, G3     | 0.440 |
| 7973201166_R02C01         | ID_7973201166_R02C01         | Fresh-frozen        | 450k  | Cavalli   | MB, G3     | 0.383 |
| 7973219003_R01C01         | ID_7973219003_R01C01         | Fresh-frozen        | 450k  | Cavalli   | MB, G3     | 0.493 |
| 7973219008_R04C01         | ID_7973219008_R04C01         | Fresh-frozen        | 450k  | Cavalli   | MB, G4     | 0.899 |
| 7973219018_R01C01         | ID_7973219018_R01C01         | Fresh-frozen        | 450k  | Cavalli   | MB, G3     | 0.860 |
| 7973219040_R04C02         | ID_7973219040_R04C02         | Fresh-frozen        | 450k  | Cavalli   | MB, G4     | 0.875 |
| 8942326054_R03C02         | ID_8942326054_R03C02         | Fresh-frozen        | 450k  | Cavalli   | MB, G3     | 0.481 |
| 9326189004_R03C02         | ID_9326189004_R03C02         | Fresh-frozen        | 450k  | Cavalli   | MB, G4     | 0.758 |
| 9326189013newLazer_R01C01 | ID_9326189013newLazer_R01C01 | Fresh-frozen        | 450k  | Cavalli   | MB, G4     | 0.882 |
| 9326189013newLazer_R03C01 | ID_9326189013newLazer_R03C01 | Fresh-frozen        | 450k  | Cavalli   | MB, G4     | 0.529 |
| 9326189023_R06C01         | ID_9326189023_R06C01         | Fresh-frozen        | 450k  | Cavalli   | MB, G4     | 0.798 |
| 9326189024newLazer_R03C01 | ID_9326189024newLazer_R03C01 | Fresh-frozen        | 450k  | Cavalli   | MB, G4     | 0.746 |
| 9326189024newLazer_R04C02 | ID_9326189024newLazer_R04C02 | Fresh-frozen        | 450k  | Cavalli   | MB, G3     | 0.491 |
| 9326189025newLazer_R04C02 | ID_9326189025newLazer_R04C02 | Fresh-frozen        | 450k  | Cavalli   | MB, G3     | 0.854 |
| 9341679041_R06C01         | ID_9341679041_R06C01         | Fresh-frozen        | 450k  | Cavalli   | MB, G4     | 0.610 |
| 9344737005_R01C01         | ID_9344737005_R01C01         | Fresh-frozen        | 450k  | Cavalli   | MB, G3     | 0.656 |
| 9344737005_R04C02         | ID_9344737005_R04C02         | Fresh-frozen        | 450k  | Cavalli   | MB, G3     | 0.583 |
| 9344737044_R06C01         | ID_9344737044_R06C01         | Fresh-frozen        | 450k  | Cavalli   | MB, G4     | 0.878 |
| 9344737073_R01C02         | ID_9344737073_R01C02         | Fresh-frozen        | 450k  | Cavalli   | MB, G3     | 0.332 |

|                   |                    |              |      |           |        |       |
|-------------------|--------------------|--------------|------|-----------|--------|-------|
| 9421912024_R01C01 | NMB119             | Fresh-frozen | 450k | Schwalbe  | MB, G4 | 0.731 |
| 9421912022_R01C02 | NMB269             | Fresh-frozen | 450k | Schwalbe  | MB, G3 | 0.721 |
| 9647455134_R01C01 | NMB325             | FFPE         | 450k | Schwalbe  | MB, G4 | 0.488 |
| 7970368088_R05C01 | NMB440             | Fresh-frozen | 450k | Schwalbe  | MB, G3 | 0.721 |
| 7973201123_R06C02 | NMB445             | Fresh-frozen | 450k | Schwalbe  | MB, G3 | 0.533 |
| 9647455136_R04C01 | NMB476             | Fresh-frozen | 450k | Schwalbe  | MB, G3 | 0.733 |
| 9421912041_R01C01 | NMB49              | Fresh-frozen | 450k | Schwalbe  | MB, G4 | 0.889 |
| 6229017107_R01C02 | NMB583             | Fresh-frozen | 450k | Schwalbe  | MB, G4 | 0.519 |
| 7973201167_R01C02 | NMB717             | Fresh-frozen | 450k | Schwalbe  | MB, G4 | 0.522 |
| 9403904011_R01C02 | NMB795             | Fresh-frozen | 450k | Schwalbe  | MB, G3 | 0.697 |
| 7970368034_R06C02 | PNET30032          | FFPE         | 450k | Schwalbe  | MB, G4 | 0.617 |
| 9647455150_R05C01 | PNET350120         | FFPE         | 450k | Schwalbe  | MB, G3 | 0.239 |
| 9647455134_R02C02 | PNET350241         | FFPE         | 450k | Schwalbe  | MB, G4 | 0.801 |
| 8622007029_R01C02 | 5M3                | Fresh-frozen | 450k | Northcott | MB, G4 | 0.686 |
| 9374341006_R05C02 | ICGC_MB223         | Fresh-frozen | 450k | Northcott | MB, G3 | 0.884 |
| 9406921070_R01C02 | P036_64906_diag    | FFPE         | 450k | Northcott | MB, G4 | 0.180 |
| 9553932002_R05C01 | AK_2652_12         | FFPE         | 450k | Northcott | MB, G3 | 0.791 |
| 9610361029_R06C02 | AK_4480_08         | FFPE         | 450k | Northcott | MB, G3 | 0.809 |
| 9610361022_R06C02 | AK_4981_10         | FFPE         | 450k | Northcott | MB, G3 | 0.516 |
| 9761749088_R02C02 | ICGC_MB289         | Fresh-frozen | 450k | Northcott | MB, G3 | 0.861 |
| 9968646163_R05C02 | P036_69190_ref     | FFPE         | 450k | Northcott | MB, G3 | 0.462 |
| 9969477090_R04C01 | ICGC_MB291         | Fresh-frozen | 450k | Northcott | MB, G3 | 0.787 |
| 3999543042_R02C02 | P036_75374_ref     | FFPE         | 450k | Northcott | MB, G4 | 0.384 |
| 3998920116_R05C02 | T51_MB             | Fresh-frozen | 450k | Northcott | MB, G3 | 0.804 |
| 9741950157_R05C02 | SJMB03-UPN10669654 | FFPE         | 450k | SJMB03    | MB, G3 | 0.707 |
| 9741950172_R01C01 | SJMB03-UPN13648866 | FFPE         | 450k | SJMB03    | MB, G3 | 0.849 |
| 9934987066_R04C01 | SJMB03-UPN18600500 | FFPE         | 450k | SJMB03    | MB, G4 | 0.211 |

**Supplementary table 1.** List of samples excluded from study due to low classifier prediction score using Heidelberg molecular neuropathology brain tumour classifier. For each sample, its IDAT identifier, study ID, study, provisional classification and prediction score are given.

| Idat                      | Study ID                     | Derivative Material | Array | Study     | Prediction    | Score |
|---------------------------|------------------------------|---------------------|-------|-----------|---------------|-------|
| 200498360016_R03C01       | 91426                        | FFPE                | EPIC  | Northcott | CONTR, CEBM   | 0.497 |
| 200790260040_R07C01       | P036_93488_diag              | Fresh-frozen        | EPIC  | Northcott | GBM, RTK I    | 0.318 |
| 7970368034_R04C01         | NMB625                       | FFPE                | 450k  | Schwalbe  | ATRT, SHH     | 0.999 |
| 9647455136_R02C01         | NMB128                       | Fresh-frozen        | 450k  | Schwalbe  | CONTR, CEBM   | 0.999 |
| 6222421011_R05C02         | NMB168                       | Fresh-frozen        | 450k  | Schwalbe  | CONTR, CEBM   | 0.998 |
| 7970368035_R02C02         | NMB437                       | Fresh-frozen        | 450k  | Schwalbe  | GBM, MYCN     | 0.416 |
| 7970368032_R04C01         | NMB662                       | FFPE                | 450k  | Schwalbe  | ETMR          | 0.998 |
| 7970368052_R06C02         | NMB724                       | Fresh-frozen        | 450k  | Schwalbe  | ETMR          | 0.996 |
| 9422491011_R03C02         | NMB869                       | Fresh-frozen        | 450k  | Schwalbe  | GBM, MID      | 0.511 |
| 9647450105_R06C02         | PNET30035                    | FFPE                | 450k  | Schwalbe  | EPN, PF A     | 0.942 |
| 9403904116_R02C02         | NMB63                        | Fresh-frozen        | 450k  | Schwalbe  | CONTR, CEBM   | 0.957 |
| 7973201123_R01C02         | NMB441                       | Fresh-frozen        | 450k  | Schwalbe  | PLEX, PED B   | 0.758 |
| 9647455137_R03C02         | NMB823                       | FFPE                | 450k  | Schwalbe  | GBM, MID      | 0.822 |
| 7970368138_R02C02         | NMB345                       | FFPE                | 450k  | Schwalbe  | ATRT, SHH     | 0.383 |
| 9403904132_R05C02         | NMB400                       | Fresh-frozen        | 450k  | Schwalbe  | CONTR, CEBM   | 0.945 |
| 7973201008_R03C02         | NMB759                       | Fresh-frozen        | 450k  | Schwalbe  | ETMR          | 0.787 |
| 9647455134_R06C01         | PNET350049                   | FFPE                | 450k  | Schwalbe  | PLEX, PED B   | 0.487 |
| 9647455169_R03C01         | NMB485                       | Fresh-frozen        | 450k  | Schwalbe  | PLEX, PED B   | 0.192 |
| 7970368032_R03C02         | NMB617                       | FFPE                | 450k  | Schwalbe  | O IDH         | 0.319 |
| 9305651213newLazer_R06C01 | MB-0174                      | Fresh-frozen        | 450k  | Northcott | CONTR, HEMI   | 0.999 |
| 7970376150_R06C01         | MB-1351                      | Fresh-frozen        | 450k  | Northcott | RETB          | 0.589 |
| 9326189011newLazer_R04C02 | MB-2897                      | Fresh-frozen        | 450k  | Northcott | SUBEPN, SPINE | 0.340 |
| 7810920078_R06C01         | ID_7810920078_R06C01         | Fresh-frozen        | 450k  | Cavalli   | DMG, K27      | 0.420 |
| 7970368124_R03C01         | ID_7970368124_R03C01         | Fresh-frozen        | 450k  | Cavalli   | CONTR, CEBM   | 0.665 |
| 8959312036_R02C02         | ID_8959312036_R02C02         | Fresh-frozen        | 450k  | Cavalli   | CONTR, CEBM   | 0.983 |
| 9326189009newLazer_R06C01 | ID_9326189009newLazer_R06C01 | Fresh-frozen        | 450k  | Cavalli   | CONTR, CEBM   | 0.298 |
| 9344737044_R06C02         | ID_9344737044_R06C02         | Fresh-frozen        | 450k  | Cavalli   | CONTR, CEBM   | 0.437 |
| 7973201069_R01C02         | ID_7973201069_R01C02         | Fresh-frozen        | 450k  | Cavalli   | PLEX, PED B   | 0.301 |

**Supplementary table 2.** List of samples excluded from study due to non-medulloblastoma prediction using Heidelberg molecular neuropathology brain tumor classifier. For each sample, its IDAT identifier, study ID, study, provisional classification and prediction score are given.

**Supplementary Table 3.** Inter-technique mapping between subtype assignments.

| tSNE | NMF                 | SNF | Agreement |
|------|---------------------|-----|-----------|
| I    | Grp3.HR.2           | -   | 2/3       |
| II   | Grp3.HR.1           | 5   | 3/3       |
| III  | Grp3.LR.2/Grp3.LR.1 | 2   | 2/3       |
| IV   | Grp3.LR.2/Grp3.LR.1 | 6   | 2/3       |
| V    | Grp4.LR2.2          | -   | 2/3       |
| VI   | Grp4.LR2.1          | -   | 2/3       |
| VII  | Grp4.LR1.1          | 7   | 2/3       |
|      | Grp4.LR1.2          | 4   | 2/3       |
| VIII | Grp4.HR             | -   | 2/3       |

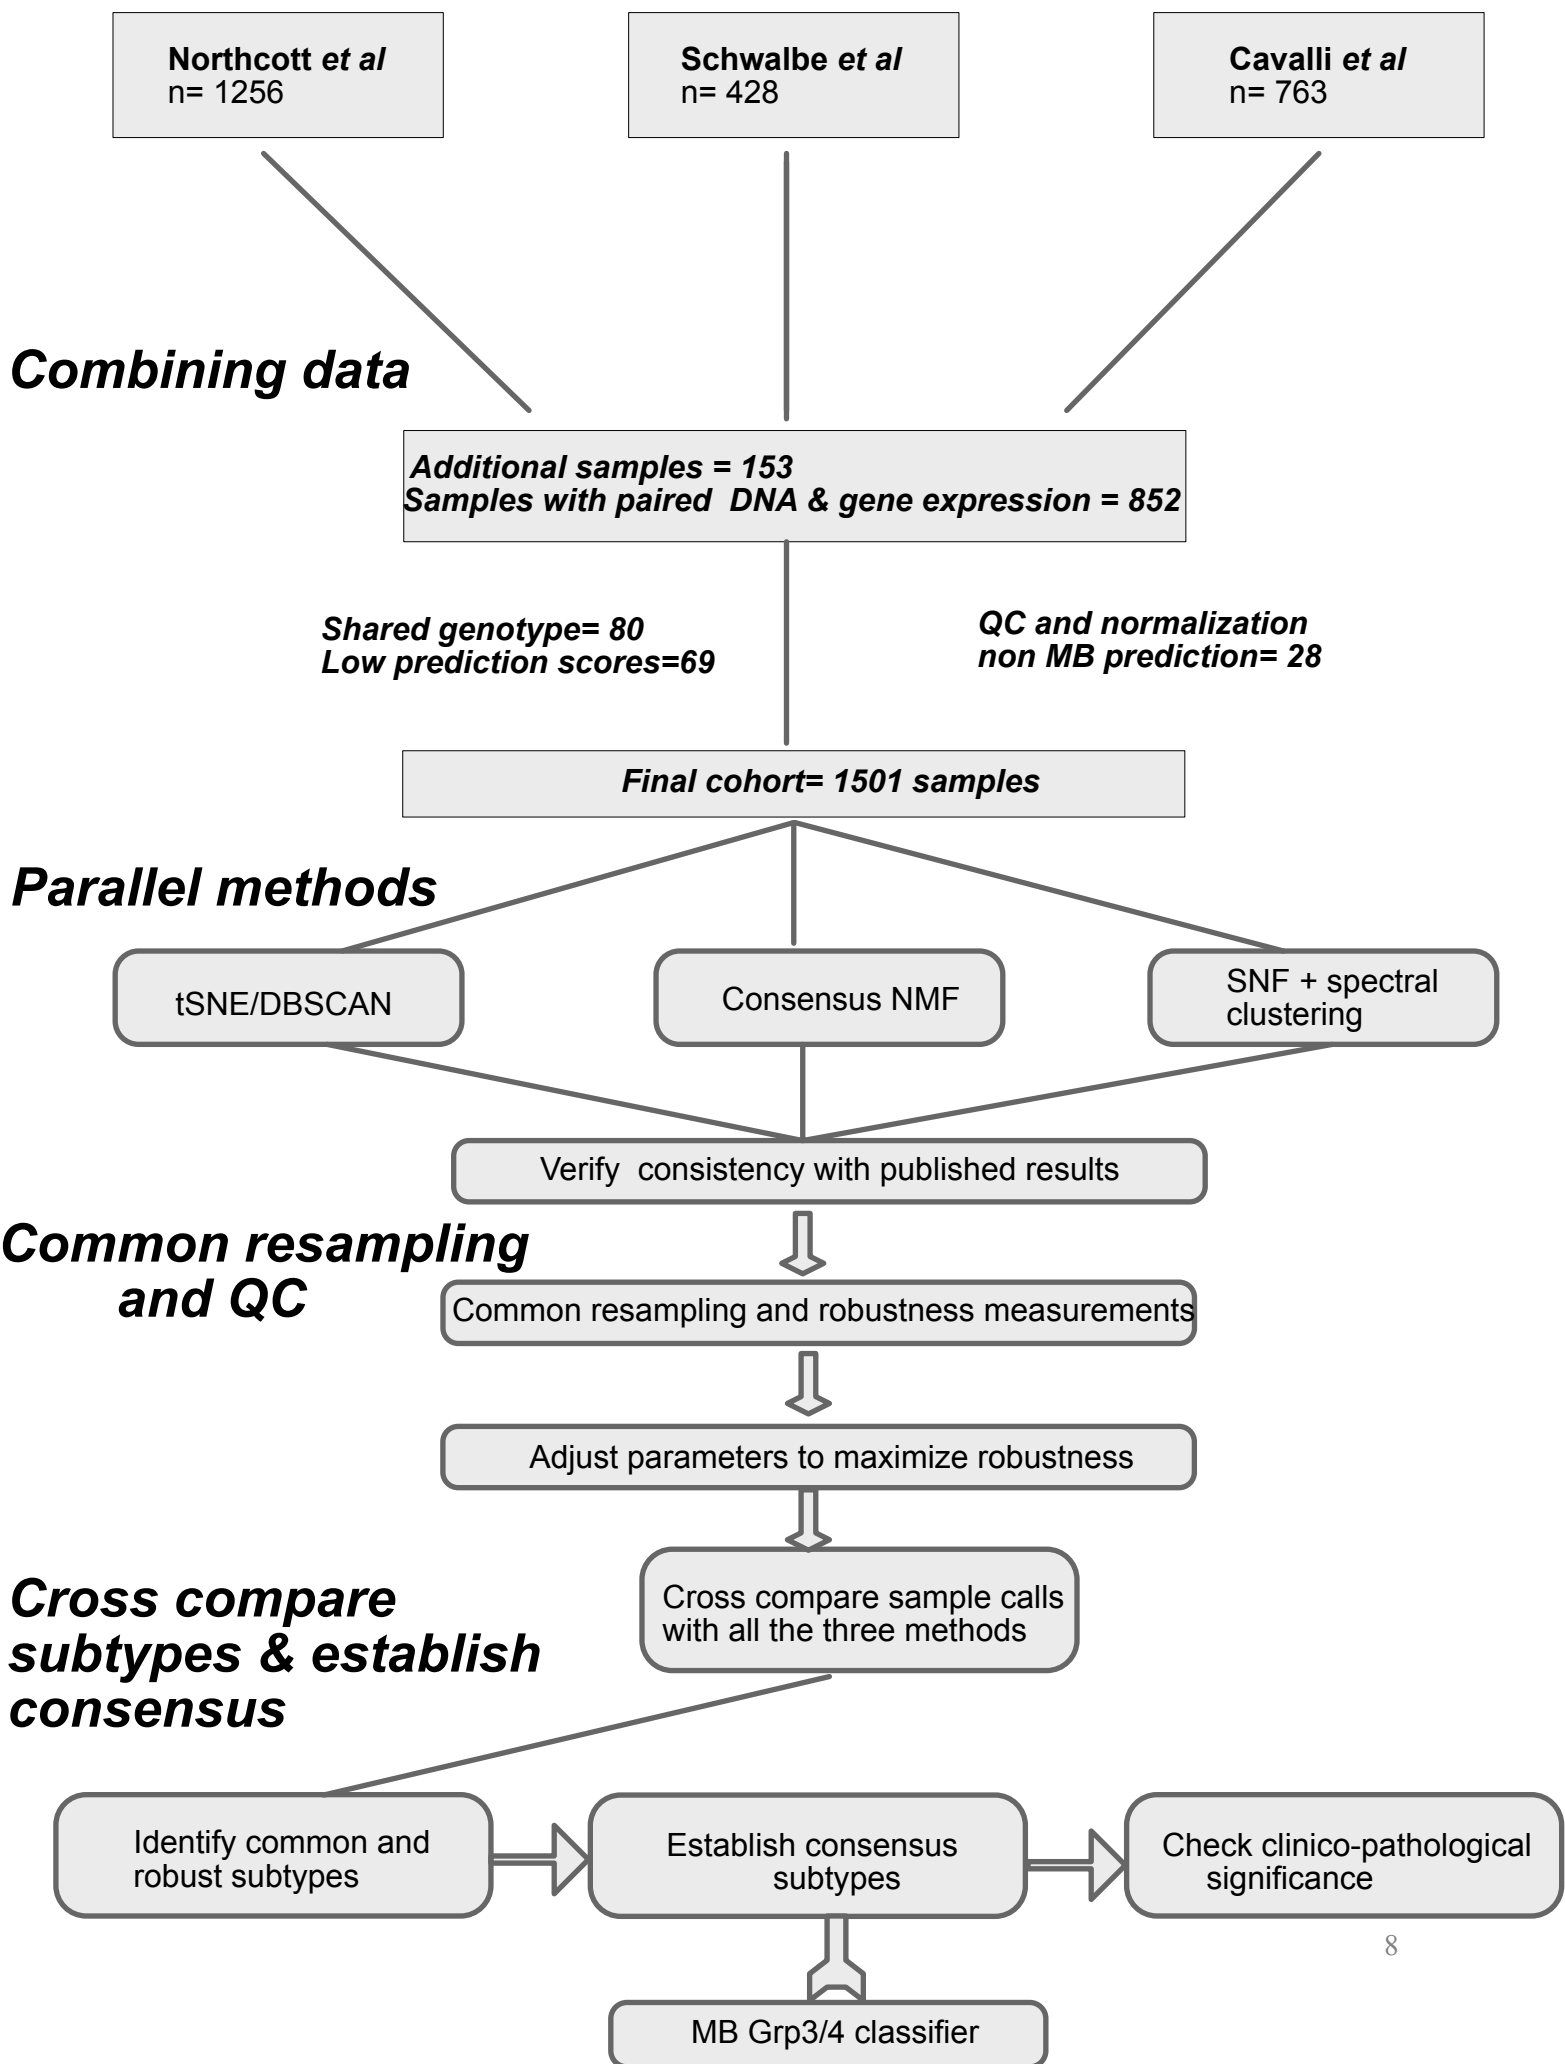



**Supplementary Figure 1.** Flowchart shows sequence of analysis to define and characterise consensus subgroups of Group 3/4 medulloblastoma

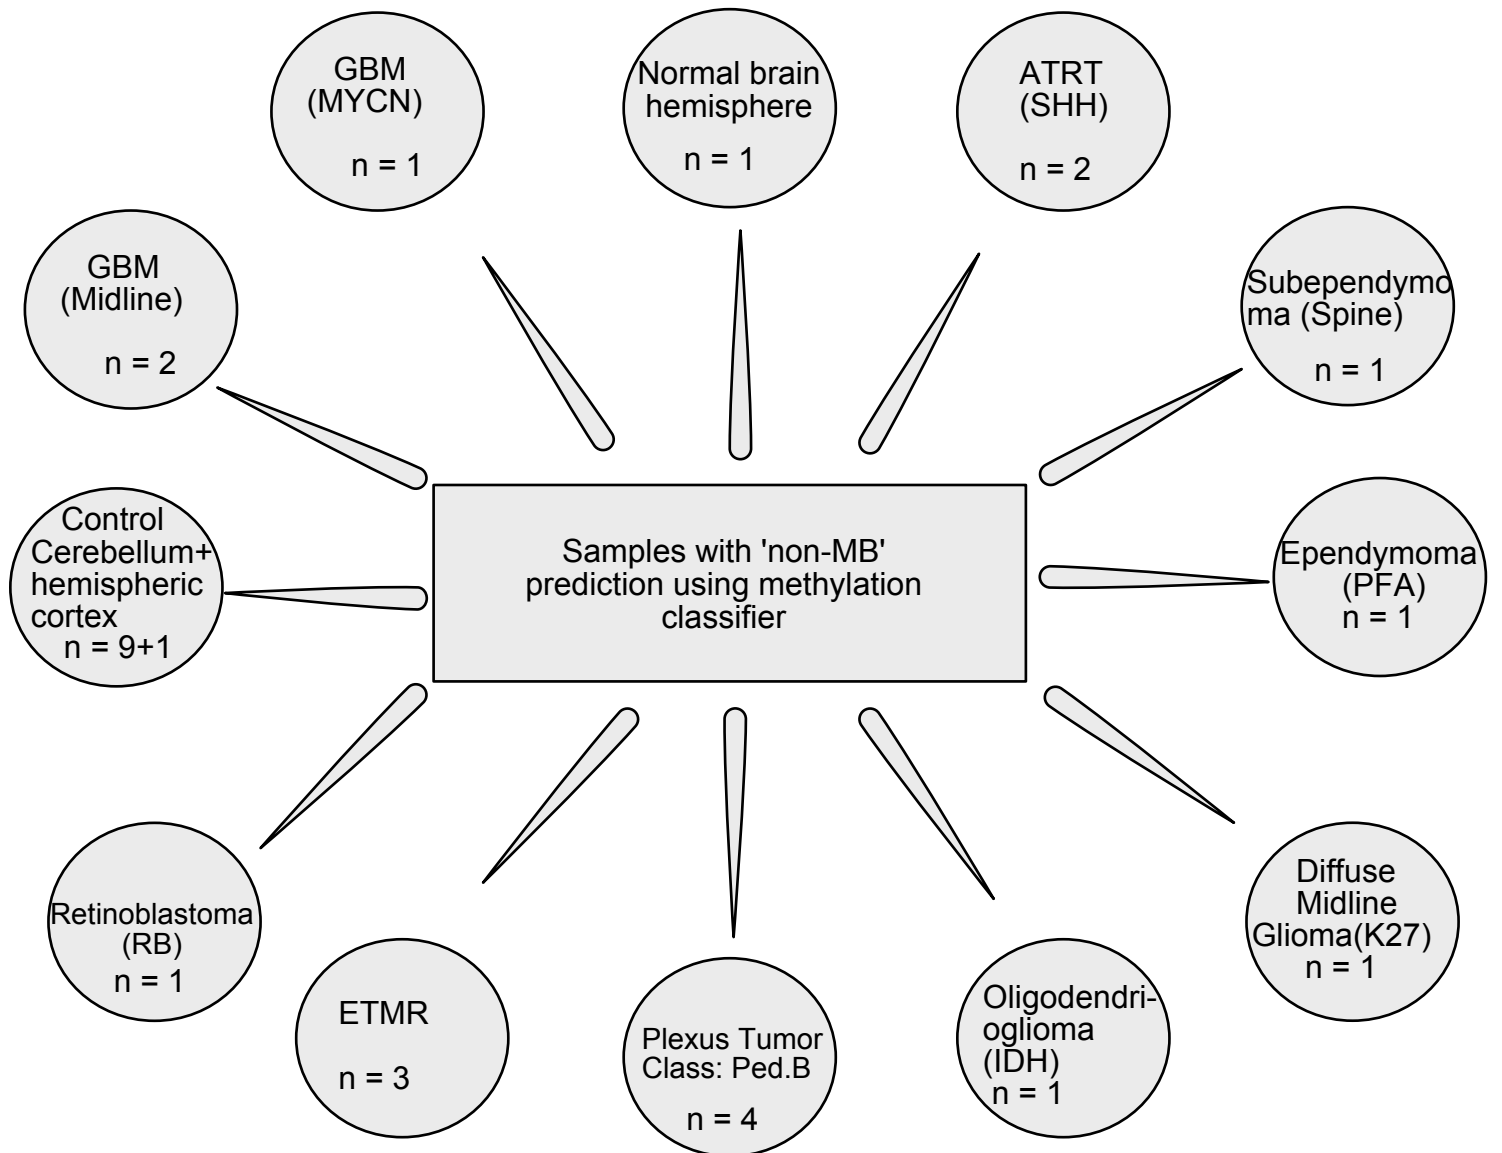

**Supplementary Figure 2.** Classification of study-specific samples designated as non-MB by methylation classifier. The detailed description of each of the classes can be found at : <https://www.molecularneuropathology.org/mnp/classifier/2>

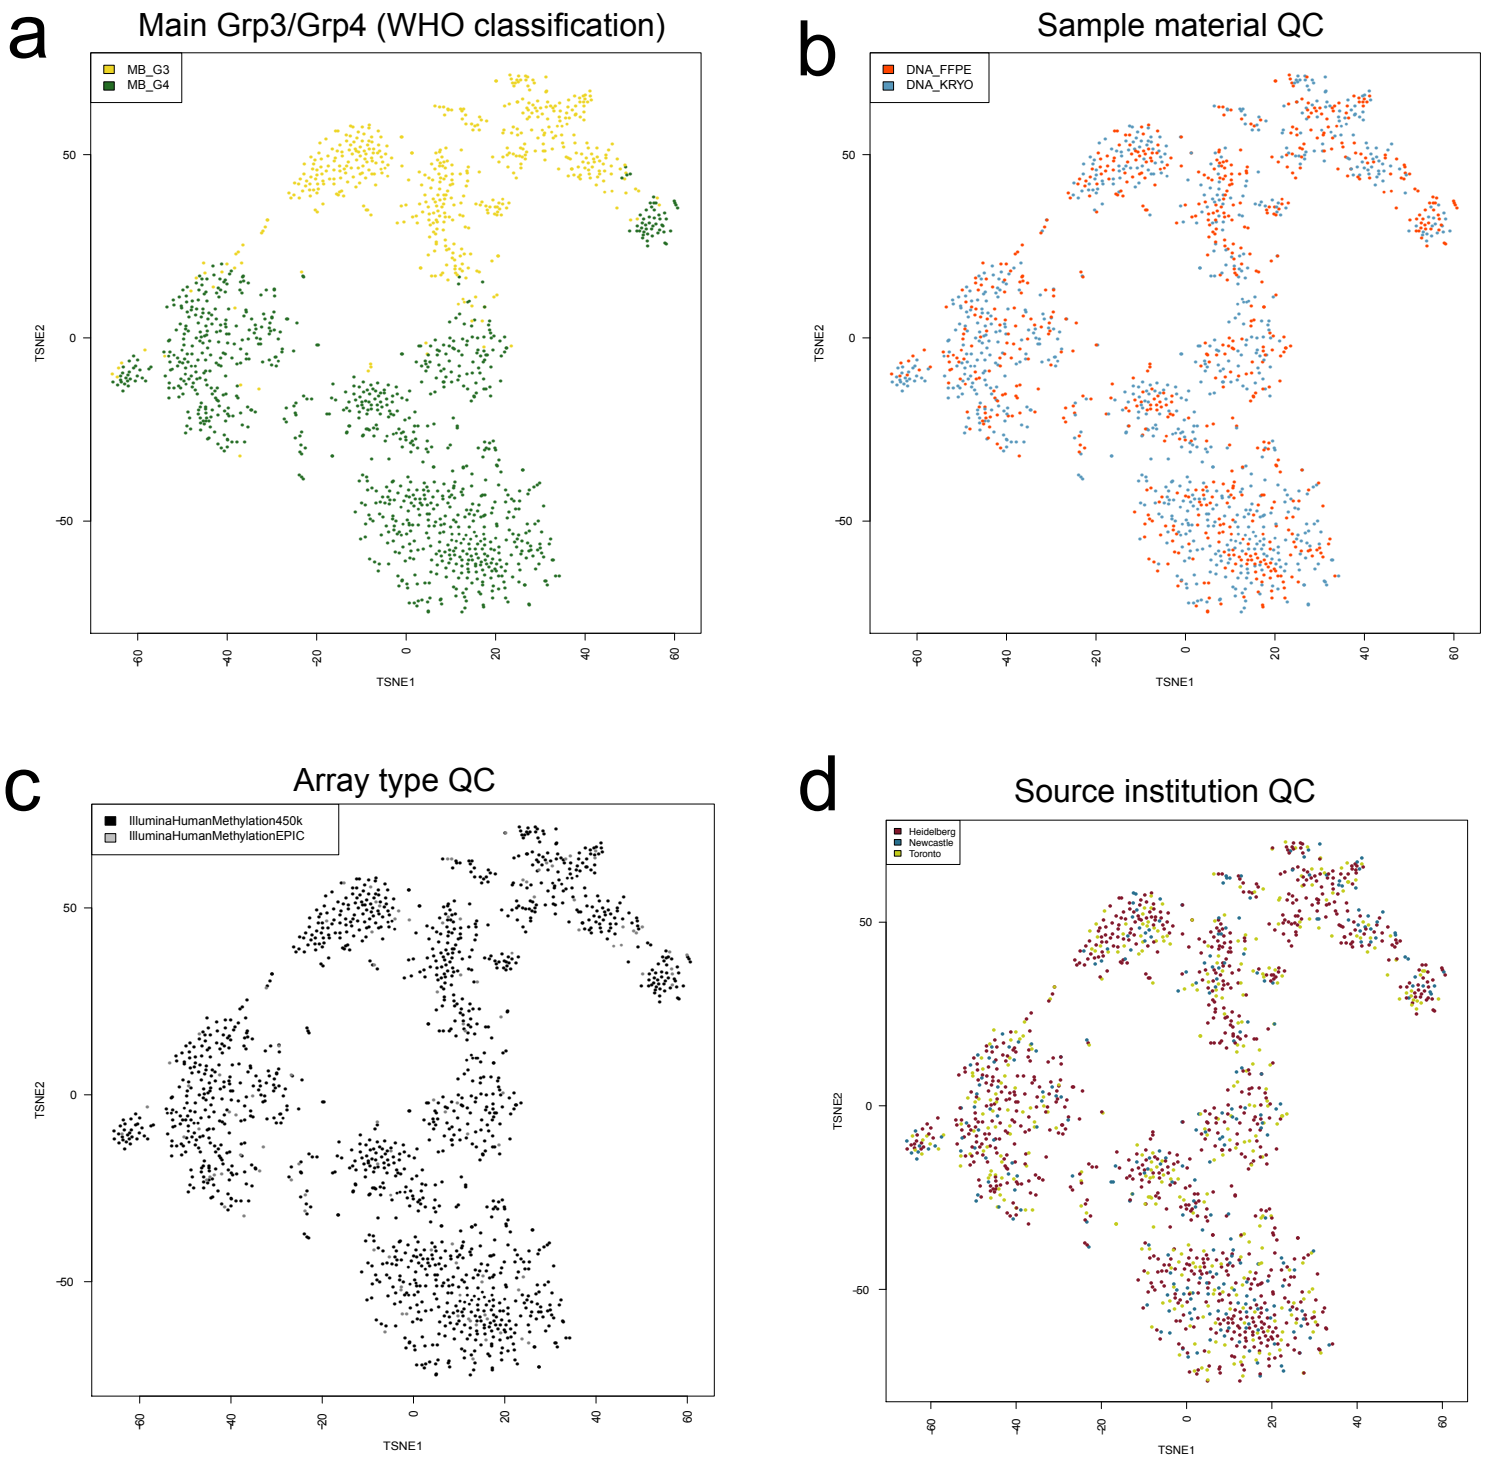

**Supplementary Figure 3. Quality control investigations reveal no bias.** **a.** t-SNE plot of entire Grp3/Grp4 cohort coloured by Grp3/4 classification (Grp3, yellow; Grp4, green) by Heidelberg MNP2.0 classifier. **b.** t-SNE plot of entire Grp3/4 cohort coloured by derivative type (fresh-frozen (KRYO), blue; formalin-fixed, paraffin embedded (FFPE), red). **c.** t-SNE plot of entire Grp3/4 cohort showing no array-based (i.e. 450k, black vs EPIC, grey) bias. **d.** t-SNE plot of entire Grp3/4 cohort shows no bias by source institution (Heidelberg, red; Newcastle, blue; Toronto, yellow).

# Resampled t-SNE and DBSCAN

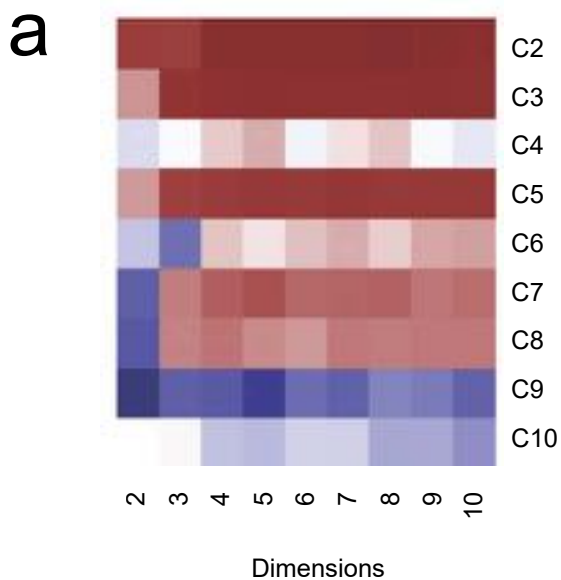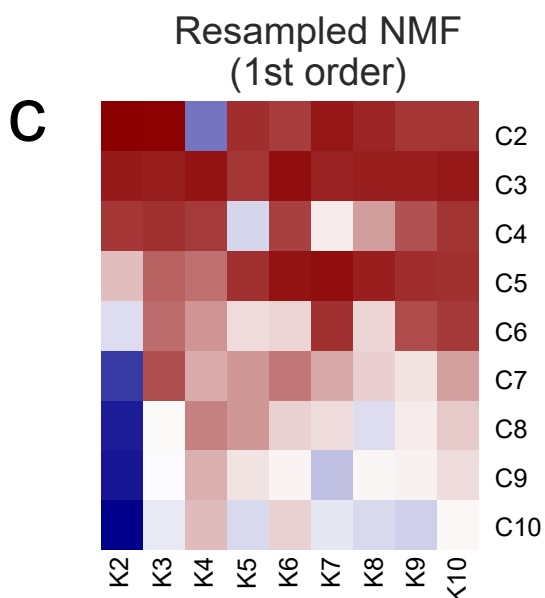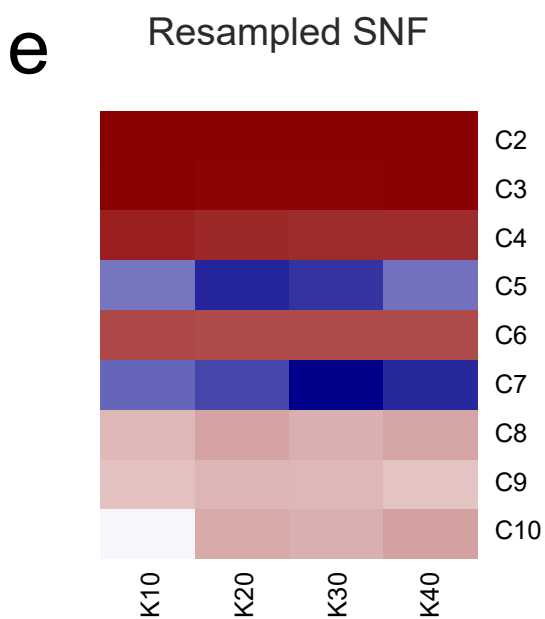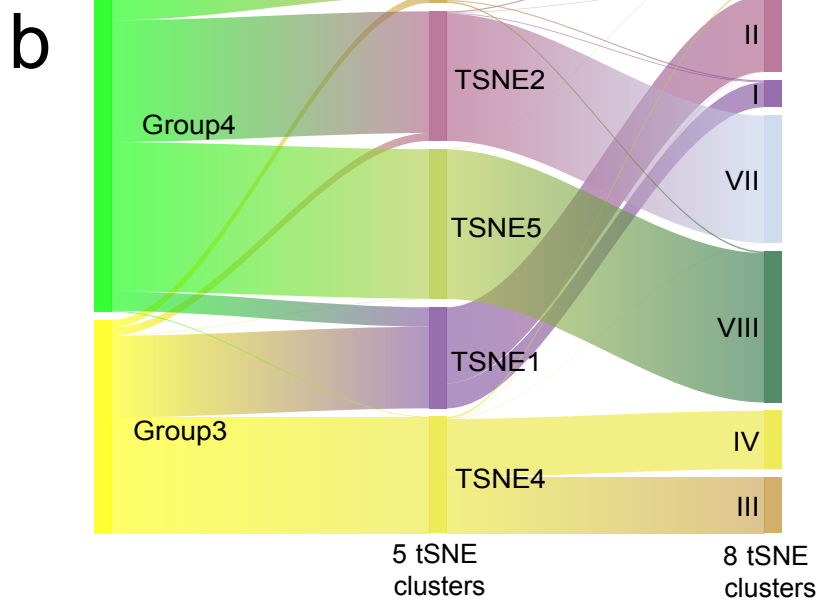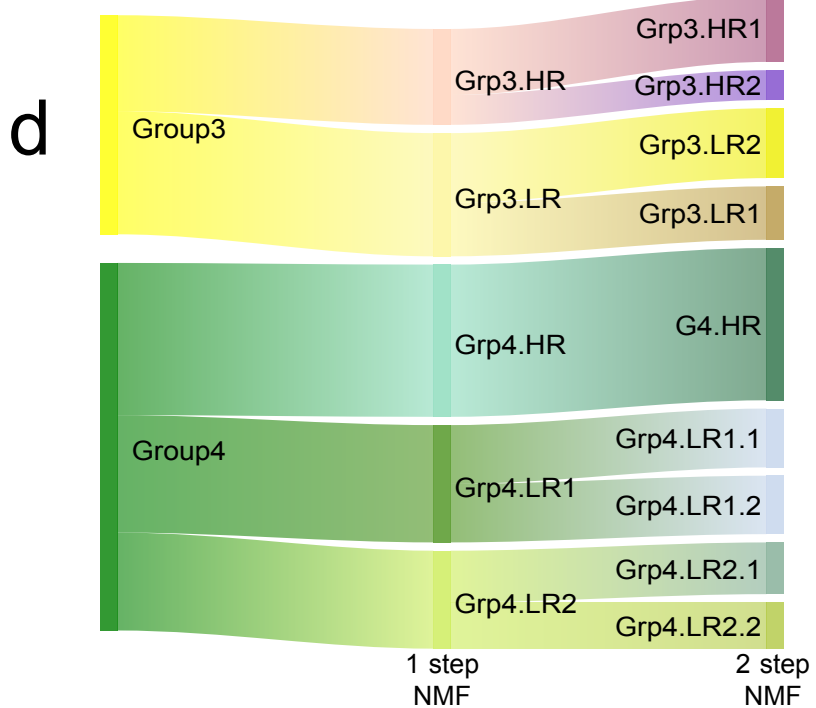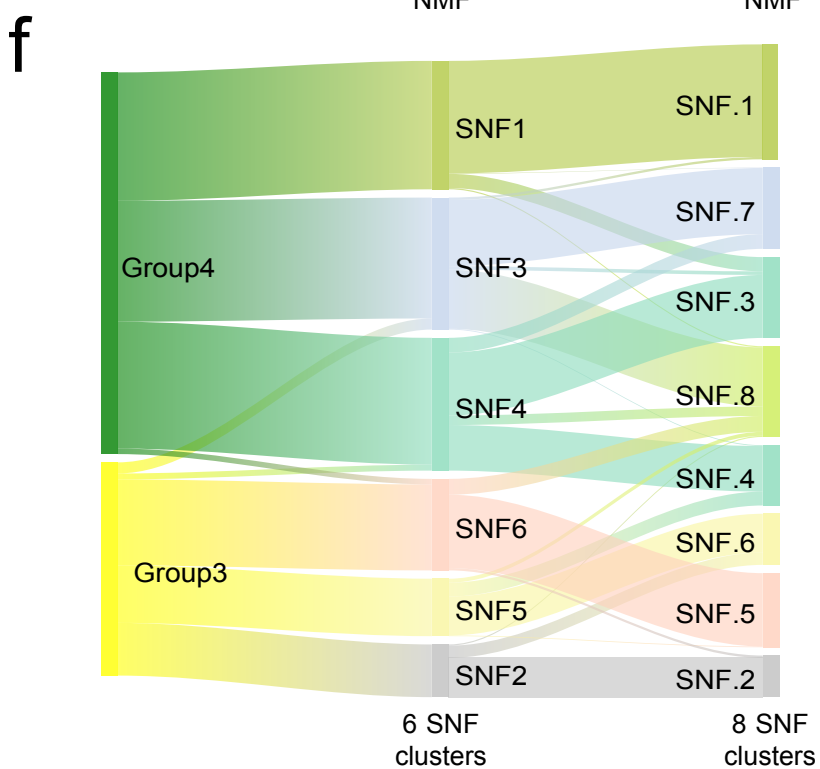

**Supplementary Figure 4. Selection of optimal subtype number through application of consensus clustering using t-SNE, NMF and SNF.** **a.** Heatmap shows sample reproducibility for differing combinations of dimensions and resultant clusters using t-SNE. Maximal reproducibility was observed at 2 and 5 clusters. There was no support beyond a maximum of 8 clusters. **b.** Sankey plot shows relationship between Grp3/4, the 5 clusters and 8 clusters identified through consensus t-SNE clustering. **c.** Heatmap shows sample reproducibility for differing combinations of NMF-defined metagenes, denoted by K, and clusters, denoted by C. Maximal sample reproducibility was observed at 5 clusters, defined by 6 metagenes. Subsequently, 2nd-order NMF was performed individually on each of the five robust clusters identified to characterize any further subtype splits. **d.** Sankey plot shows relationships between Grp3 and Grp4, the five clusters identified with 1st-order NMF and the additional subtypes identified with 2nd-order NMF. **e.** Heatmap shows sample reproducibility for SNF, with differing combinations of the k parameter and clusters, denoted by C. Maximal sample reproducibility was observed at 2 clusters, with a further local maximum at 6 clusters. Support for 8 stable clusters was also observed. **f.** Sankey plot shows relationships between Grp3 and Grp4, and for 6 and 8 clusters defined using SNF.

a

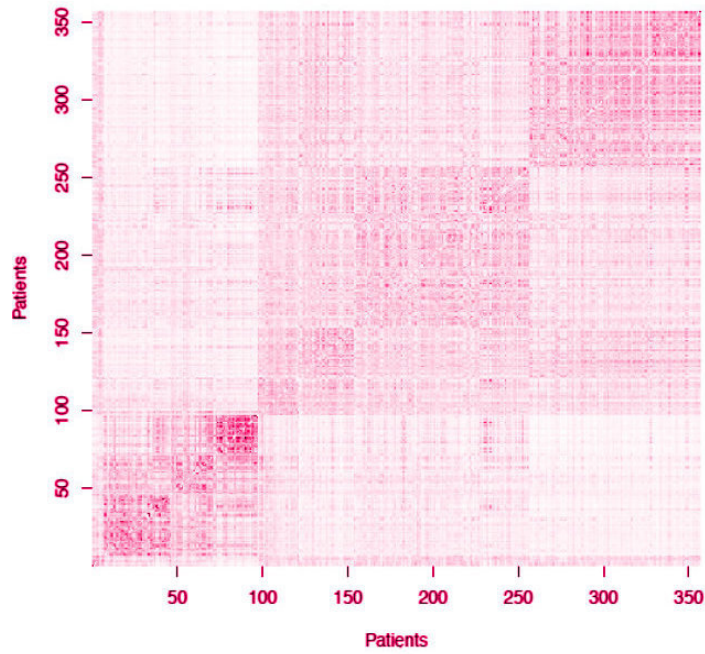

Similarity matrix showing gene expression only

b

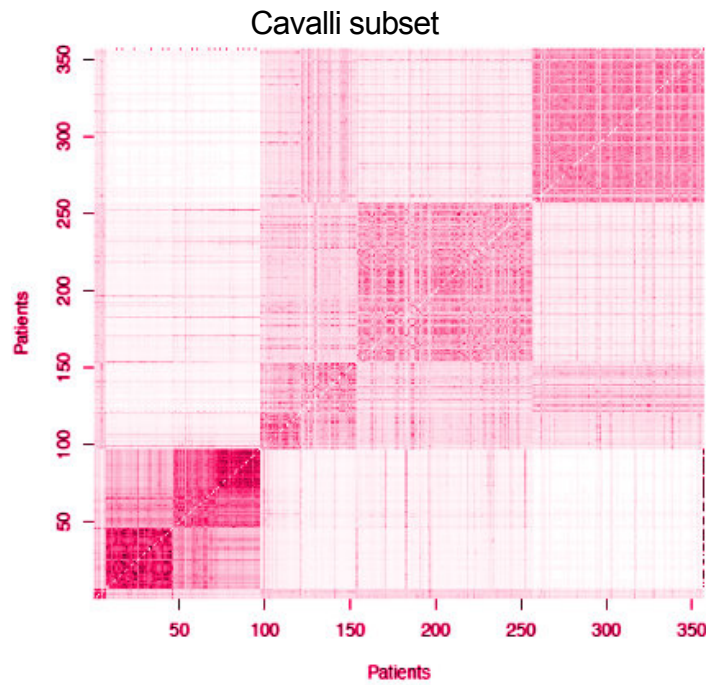

Similarity matrix showing DNA methylation only

c

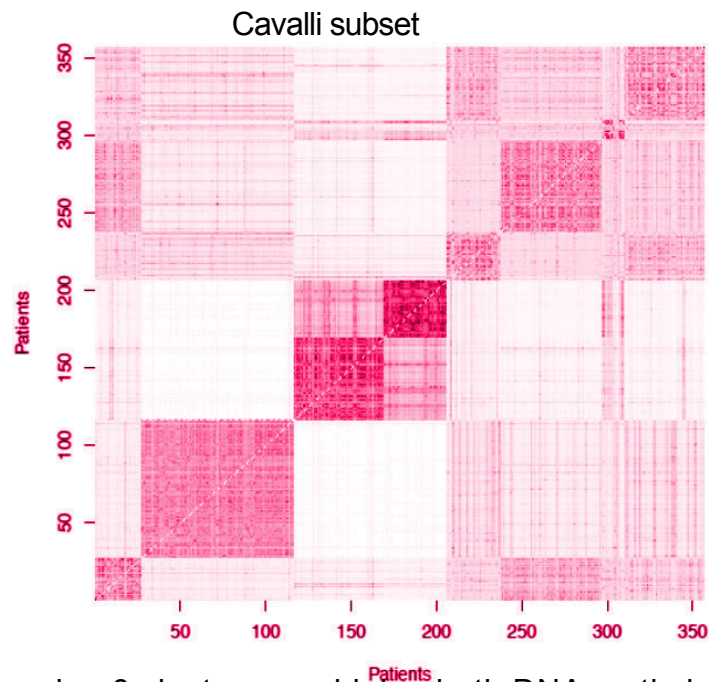

SNF similarity matrix showing 8 clusters combining both DNA methylation and gene expression  
Cavalli subset

**Supplementary Figure 5. Application of SNF clustering to the Cavalli et al dataset identifies eight subtypes.** **a.** Similarity matrix for SNF performed using only gene expression data identifies 3 major subtypes, identified by the three major blocks. **b.** Similarity matrix for SNF performed on DNA methylation data identifies 5 clusters. **c.** Similarity matrix for SNF performed on paired DNA methylation and transcriptome data identifies eight subtypes.



**a** Similarity matrix showing gene expression only Northcott et al dataset

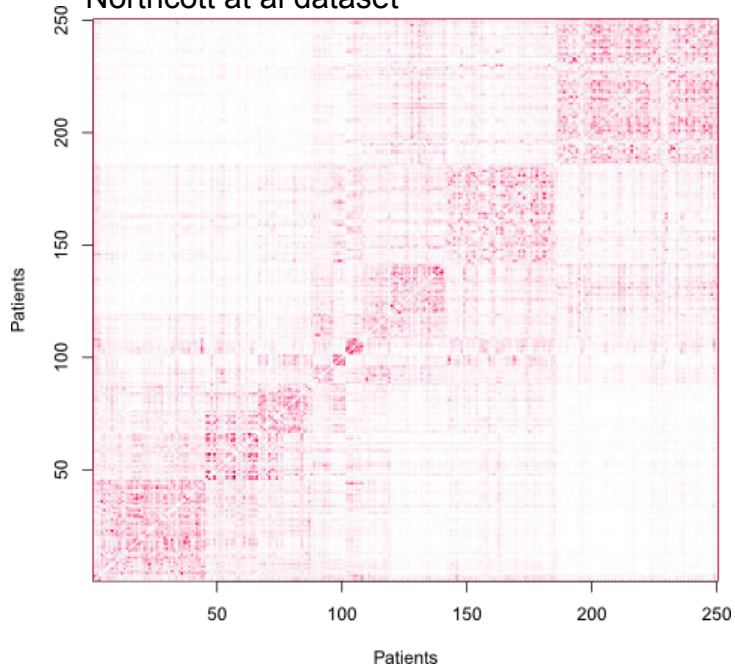

**d** Similarity matrix showing gene expression only Schwalbe et al dataset

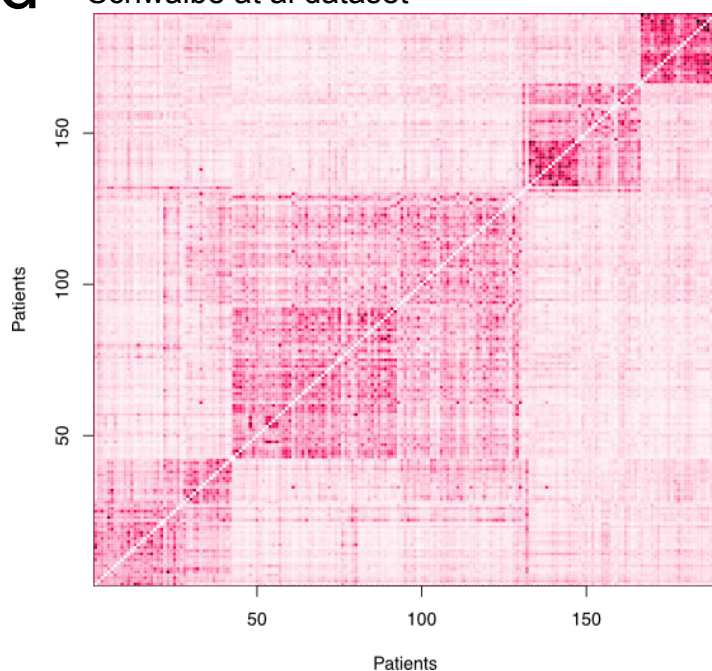

**b** Similarity matrix showing DNA methylation only Northcott et al dataset

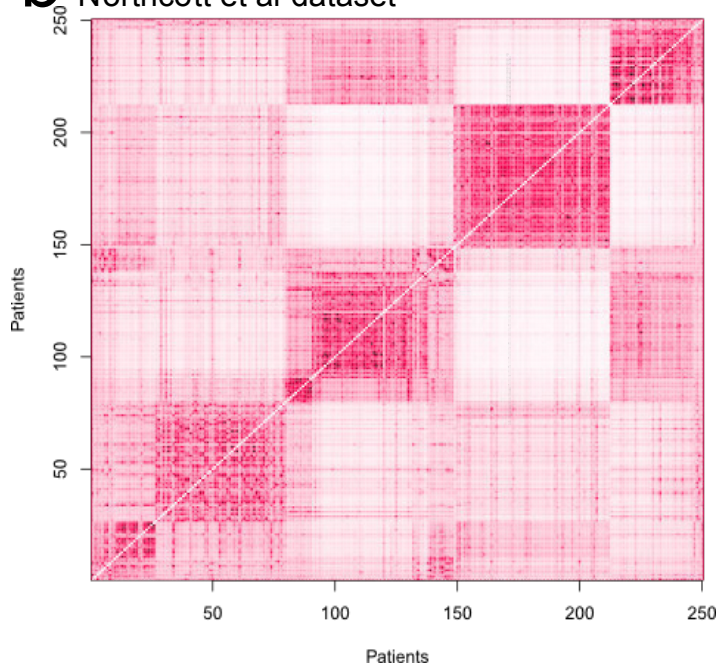

**e** Similarity matrix showing DNA methylation only Schwalbe et al dataset

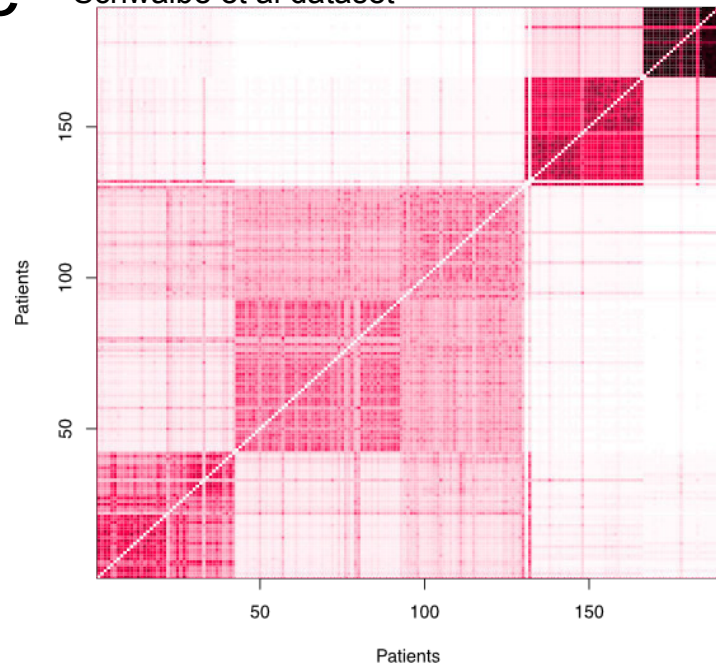

**c** Similarity matrix showing both DNA methylation and gene expression- Northcott et al dataset

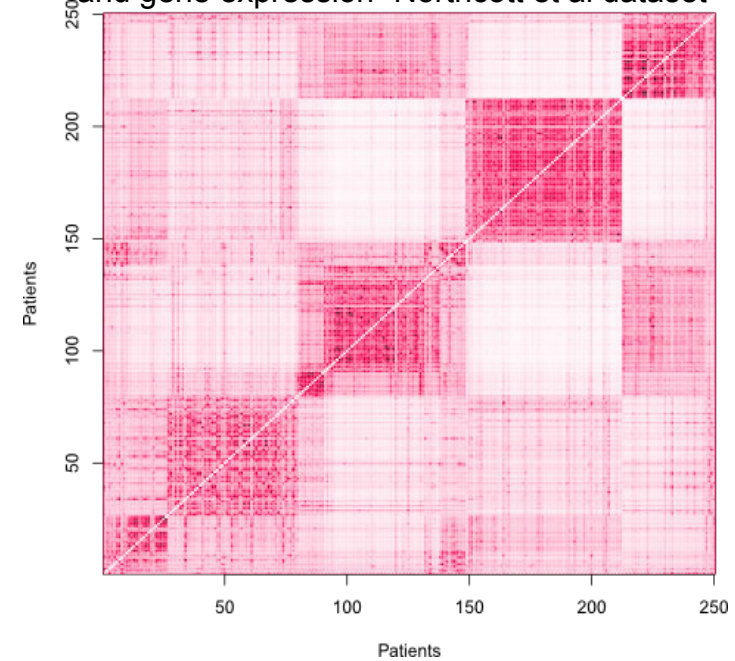

**f** Similarity matrix showing both DNA methylation and gene expression- Schwalbe et al dataset

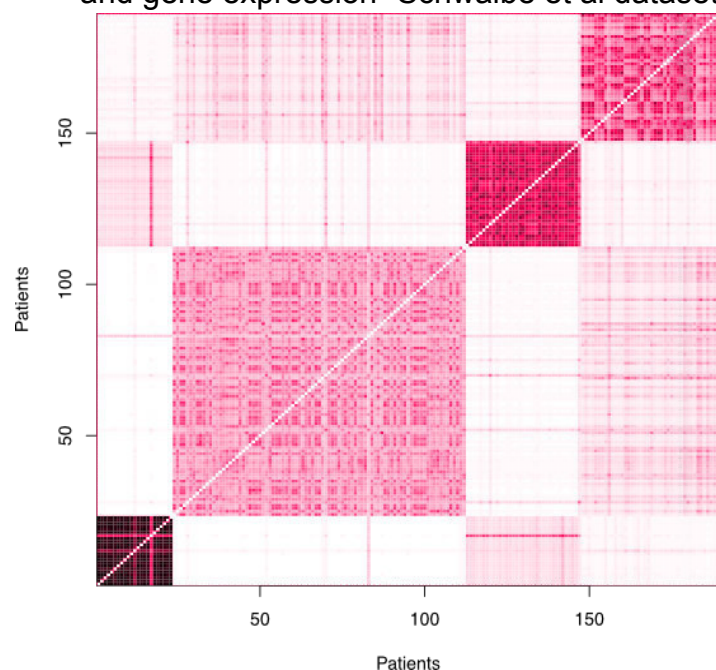



**Supplementary Figure 6. SNF recapitulates study specific subtypes for Grp3/4 subsets of Schwalbe et al. dataset.** **a.** The similarity matrix for SNF performed on RNA-seq data only identifies 4 subtypes for Schwalbe et al. dataset. **b.** The similarity matrix for SNF performed on DNA methylation data identifies 4/5 clusters. **c.** Stratification of the Schwalbe et al. dataset into 4 clusters using SNF matrix derived from combination of both DNA methylation and gene expression retrieves subtypes identified in the original study. **d.** Similarity matrix for SNF performed on gene expression data only on Northcott et al. subset fails to clearly stratify the data. **e.** Similarity matrix for SNF performed on DNA methylation data only on Northcott et al. subset identifies 5 clusters. **f.** Similarity matrix for SNF performed on paired DNA methylation and gene expression on Northcott et al. dataset identifies 5 clusters.

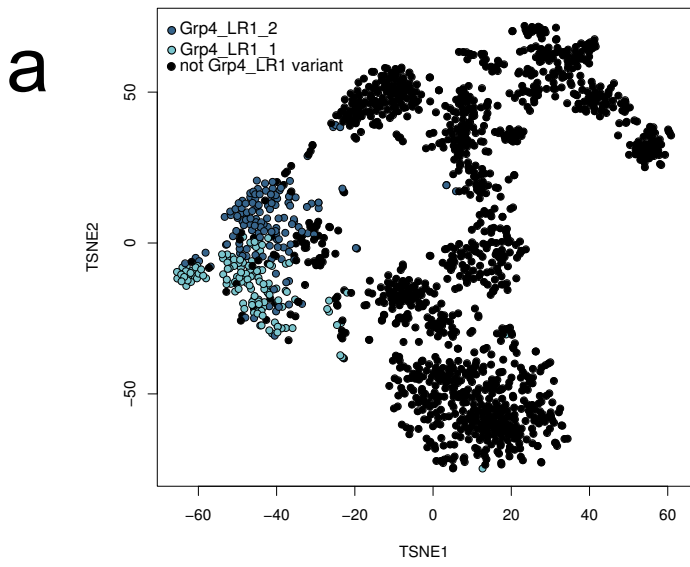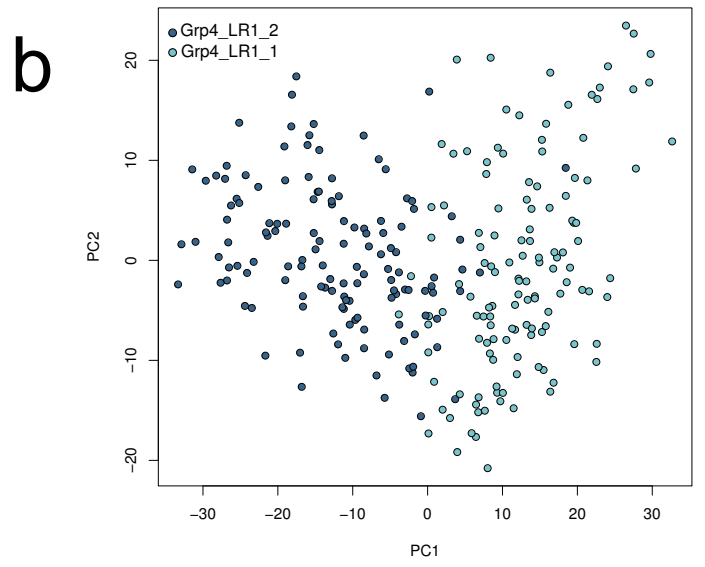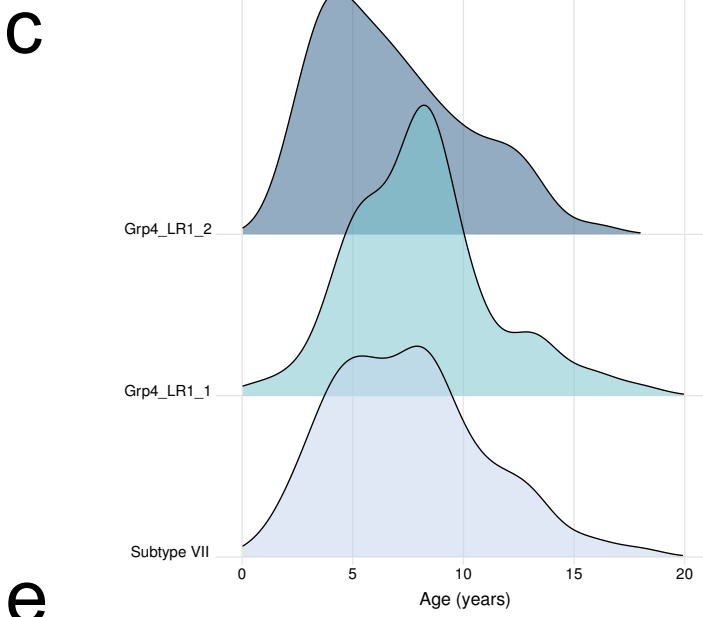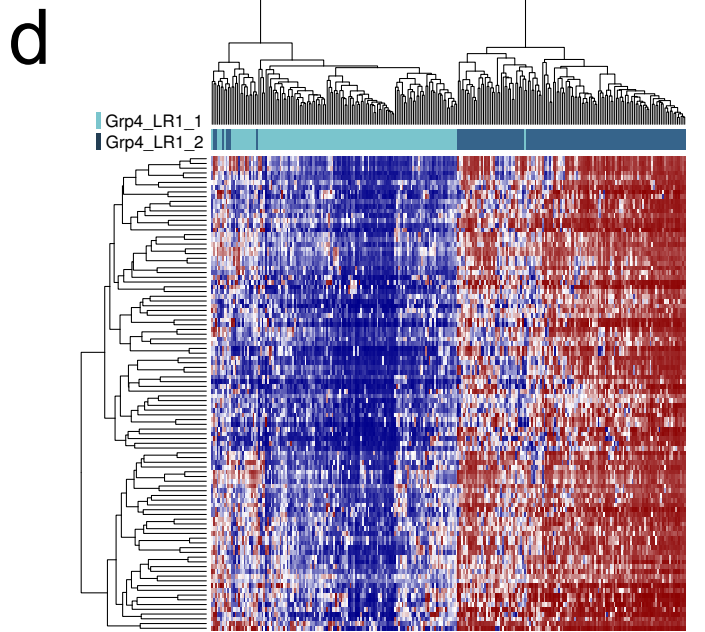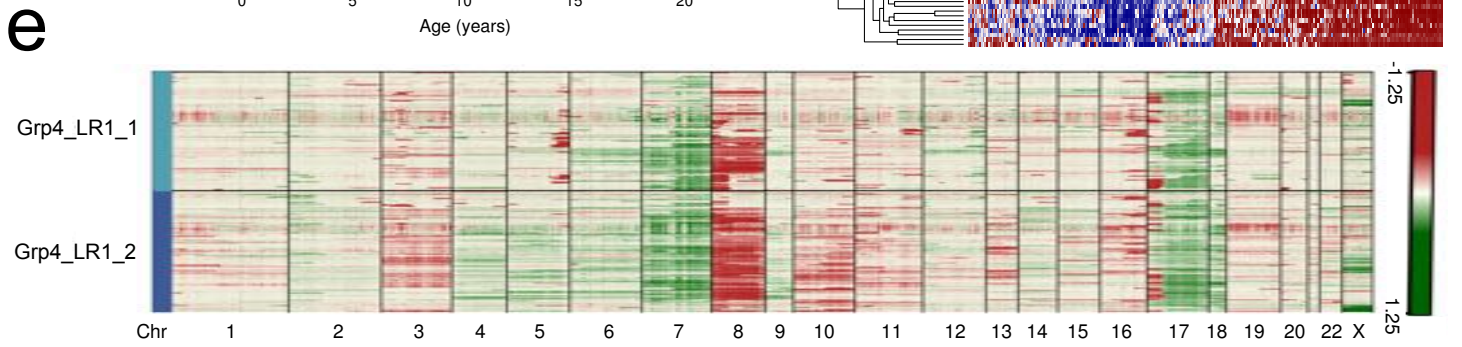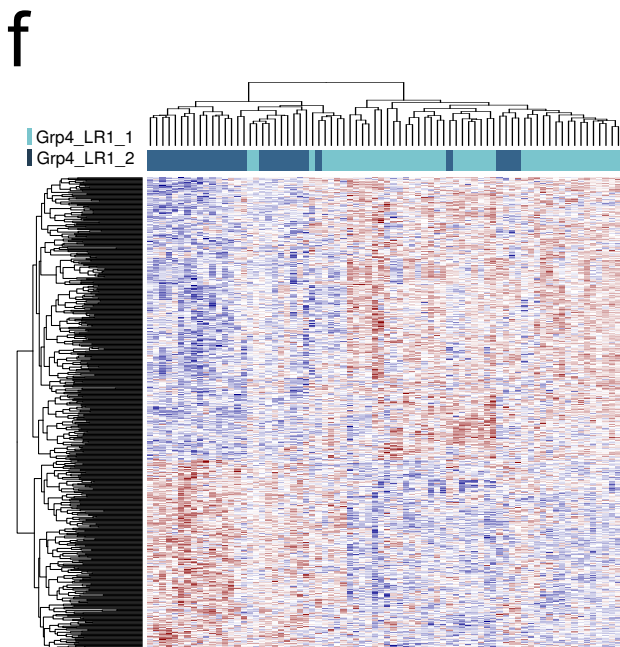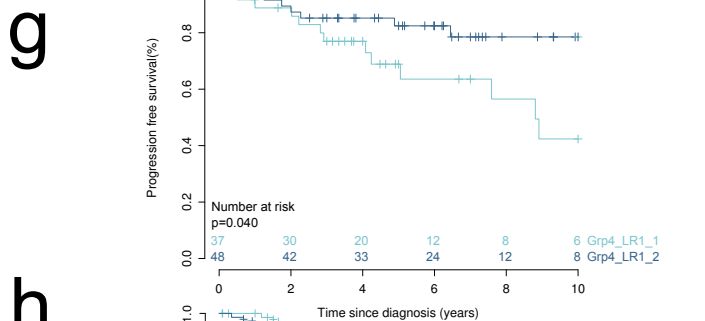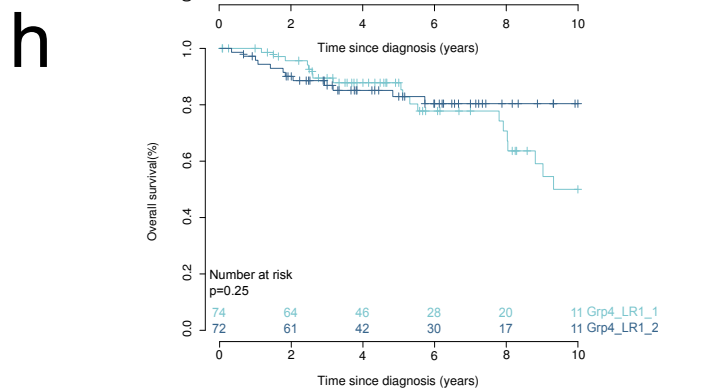

**Supplementary Figure 7. NMF identifies two variants of subtype VII.** **a.** t-SNE plot of entire Grp3/Grp4 cohort, showing two subtype VII variants (Grp4\_LR1\_1, light blue; Grp4\_LR1\_2, dark blue; other samples, black). **b.** PCA plot of subtype VII NMF-variants only, shows separation of variants. **c.** Age distributions of subtype VII, Grp4\_LR1\_1 and Grp4\_LR2\_2. **d.** Heatmap shows most variably methylated loci that distinguish variants. Unmethylated loci are shown blue, methylated are shown red. **e.** Copy number differences between NMF subtype VII variants. **f.** Gene expression differences between NMF-derived subtype VII variants for Cavalli et al. transcriptome dataset. **g, h.** Progression-free and overall survival plots for subtype VII variants Grp4\_LR1\_1 and Grp4\_LR2\_2.

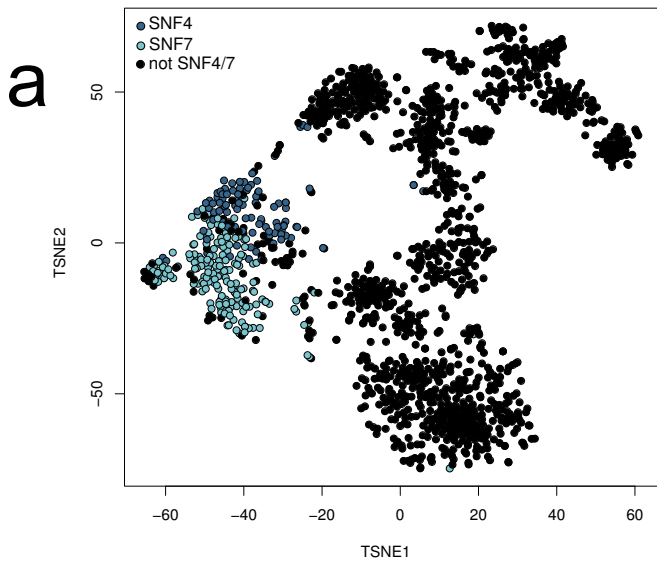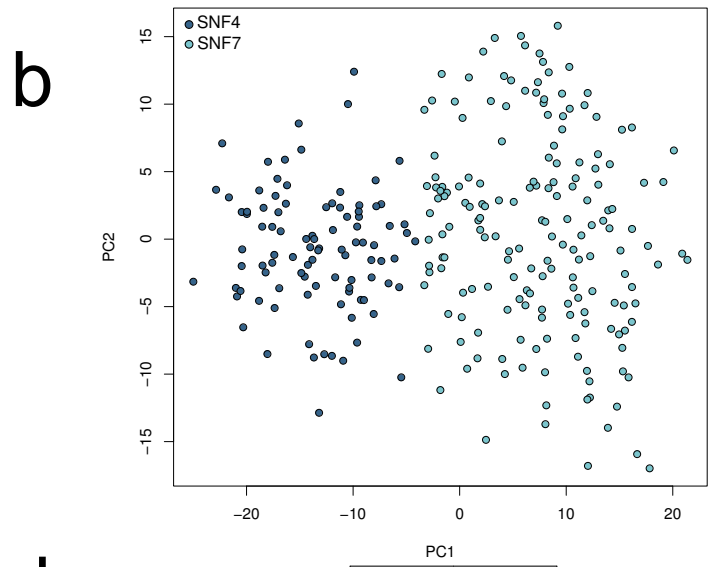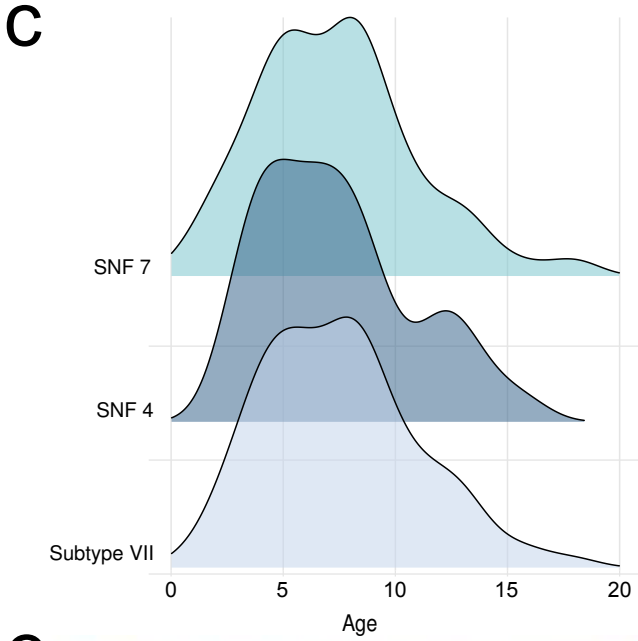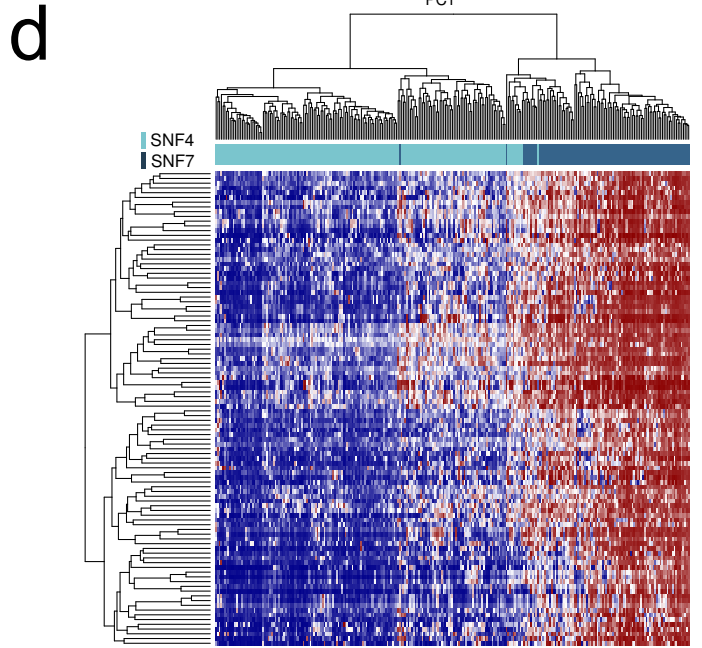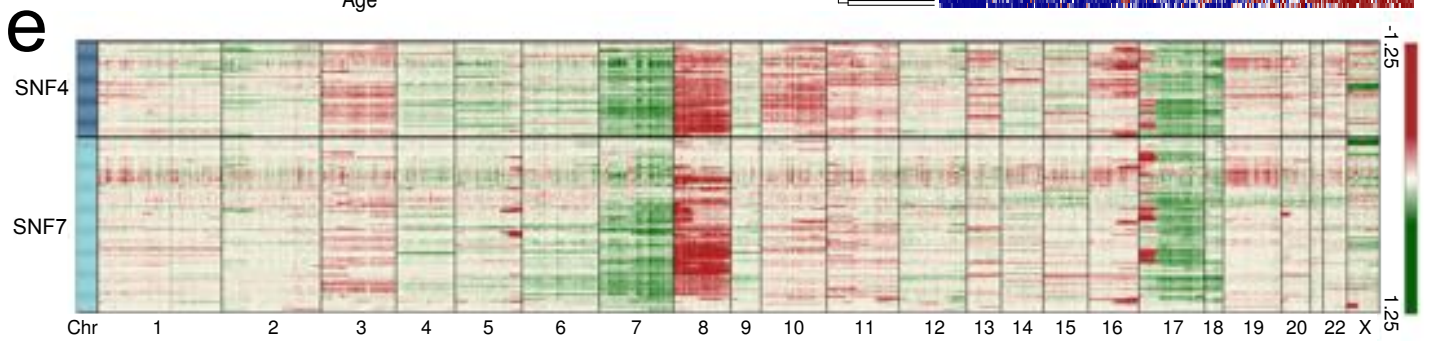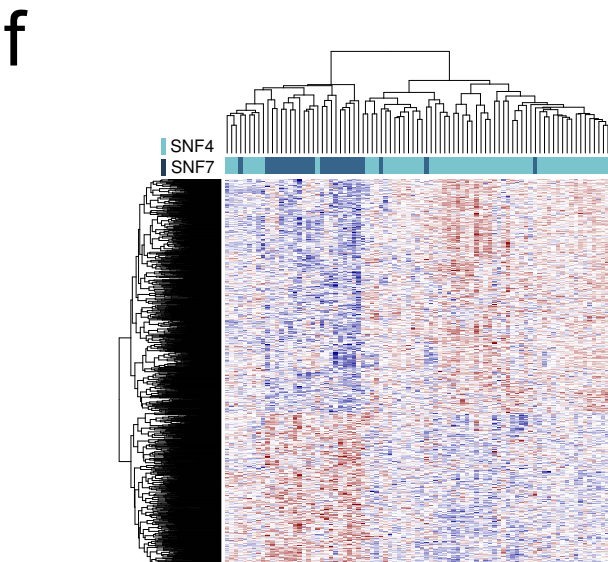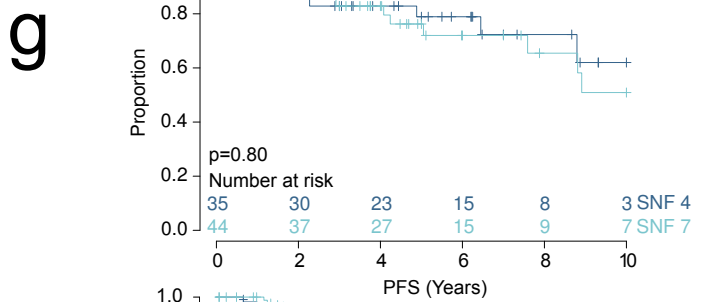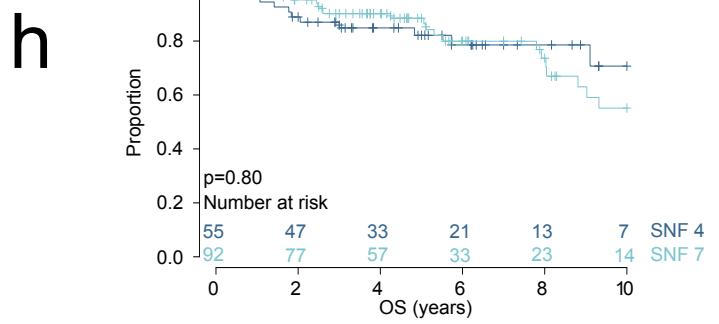

**Supplementary Figure 8. SNF identifies two variants of subtype VII.** **a.** t-SNE plot of entire Grp3/Grp4 cohort, showing two subtype VII variants (SNF 7, light blue; SNF4, dark blue; other samples, black). **b.** PCA plot of subtype VII SNF-variants only, showing separation of variants. **c.** Age distributions of subtype VII, SNF4 and SNF7. **d.** Heatmap shows most variably methylated loci. Unmethylated loci are shown blue, methylated are shown red. **e.** Copy number differences between subtype VII variants. **f.** Gene expression differences between SNF-derived subtype VII variants using Cavalli et al. transcriptome dataset. **g, h.** Progression-free and overall survival plots for subtype VII variants SNF4 and SNF7.

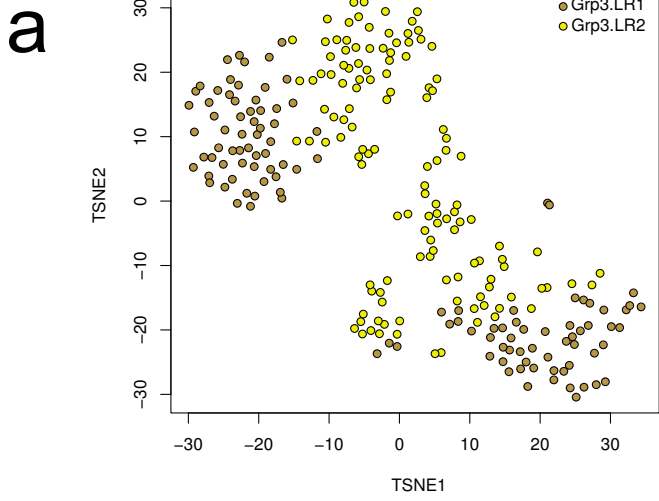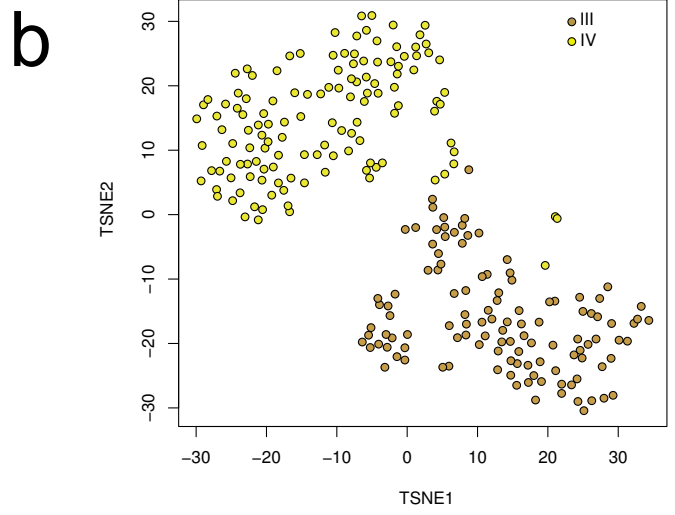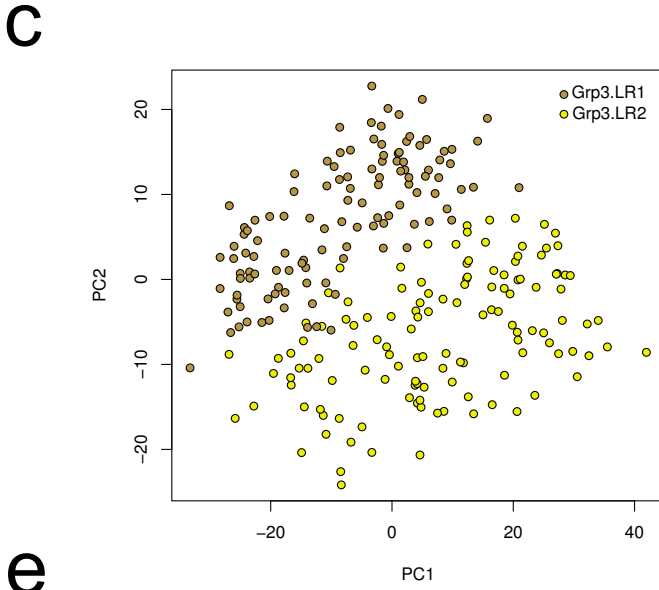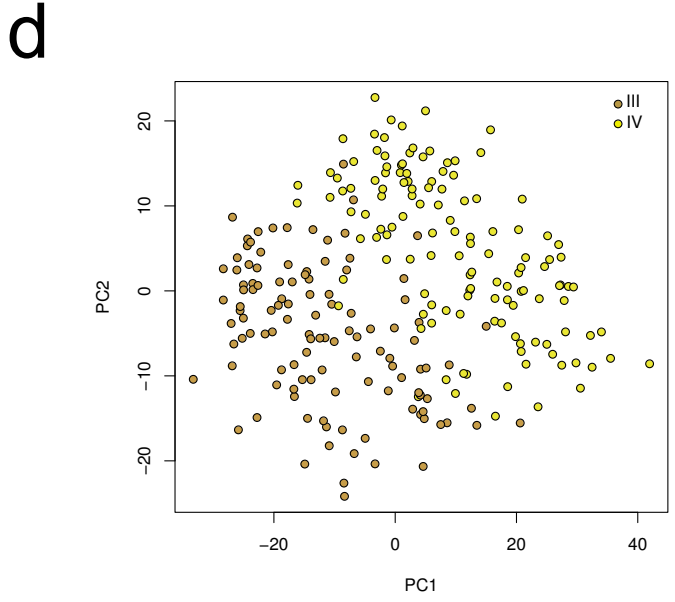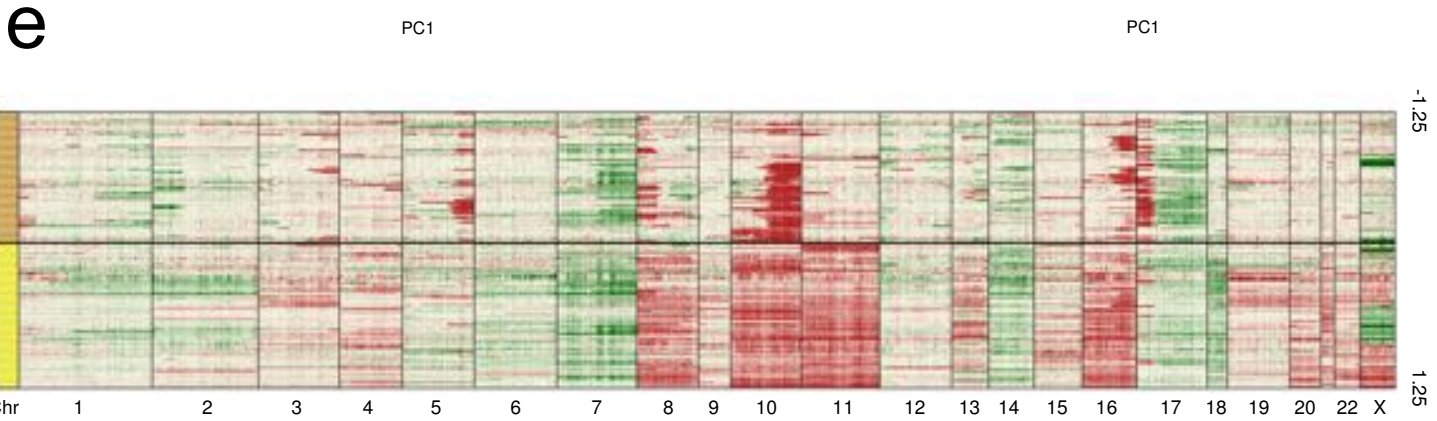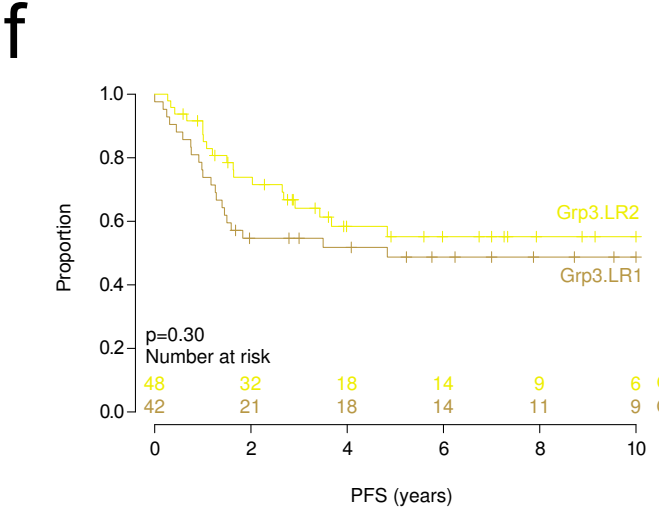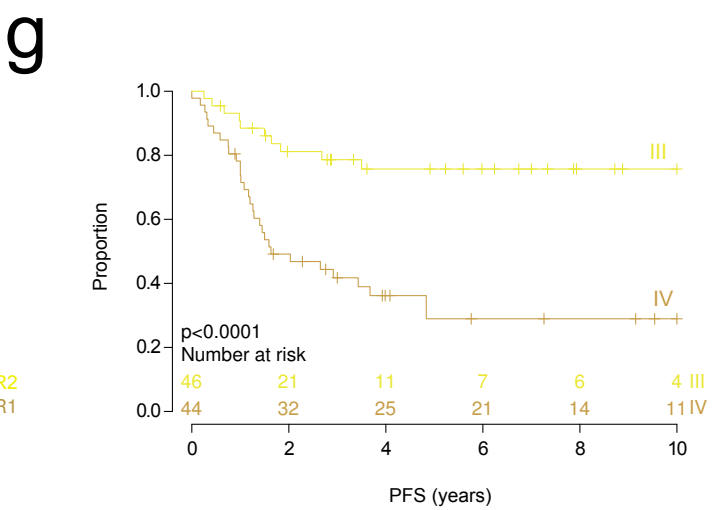

**Supplementary Figure 9. NMF incorrectly partitions consensus subtypes III/IV.** **a,b.** t-SNE plot of subtypes III and IV labelled **(a)** by NMF-derived subtypes, and **(b)** by t-SNE-derived subtypes. **c, d.** PCA plot of subtypes III and IV labelled by **(c)** NMF-derived subtypes, and **(d)** t-SNE-derived subtypes. **e.** Distinct copy-number differences are observed for III/IV subtypes that were not identified in the NMF-derived subtypes. **f, g.** Progression-free survival plots for **(f)**, NMF-derived subtypes, and **(g)**, t-SNE-derived subtypes support the adoption of III/IV subtypes in favor of NMF-derived subtypes.

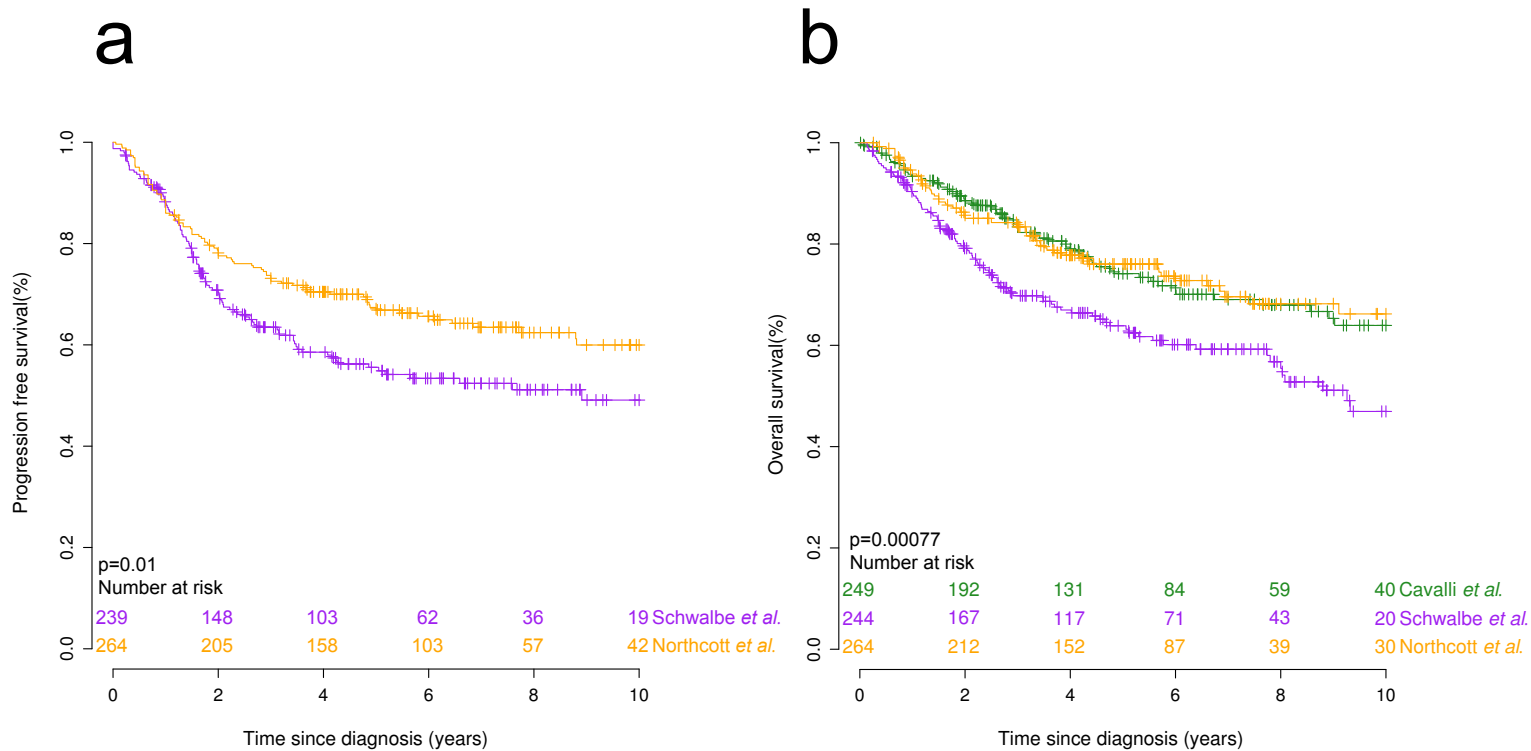

**Supplementary Figure 10: Survival analysis identifies cohort-specific survival differences. a.** Kaplan-Meier plot shows progression free survival for Schwalbe *et al.* and Northcott *et al.* cohorts. **b.** Kaplan-Meier plot shows overall survival for Schwalbe *et al.*, Cavalli *et al.* and Northcott *et al.* cohorts. At risk tables are shown in two-year increments.



**a**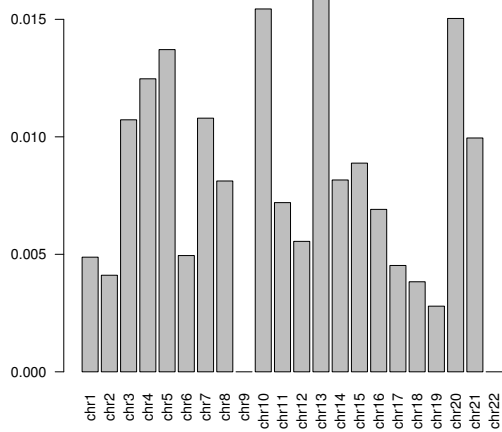**b**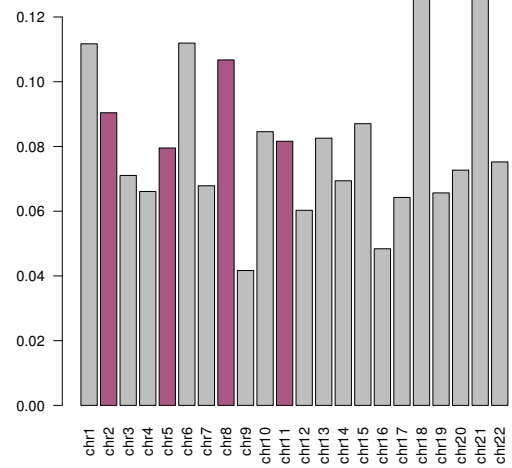**c**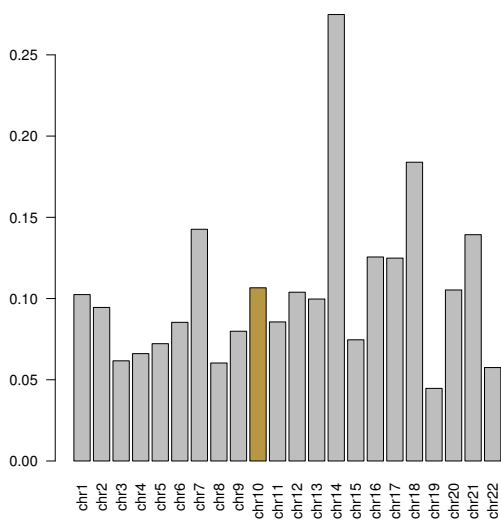**d**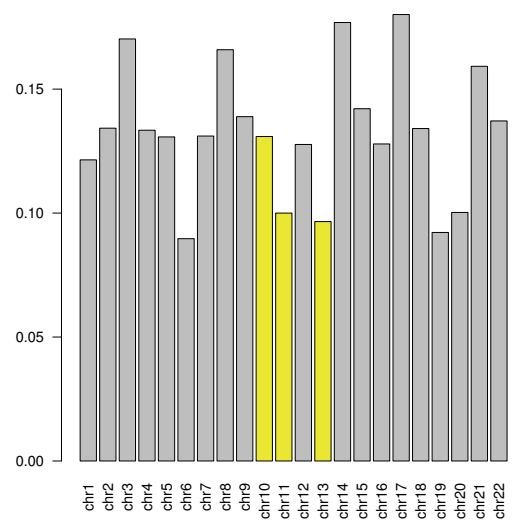**e**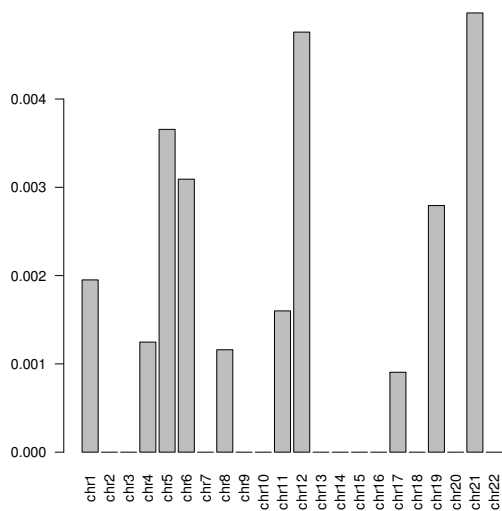**f**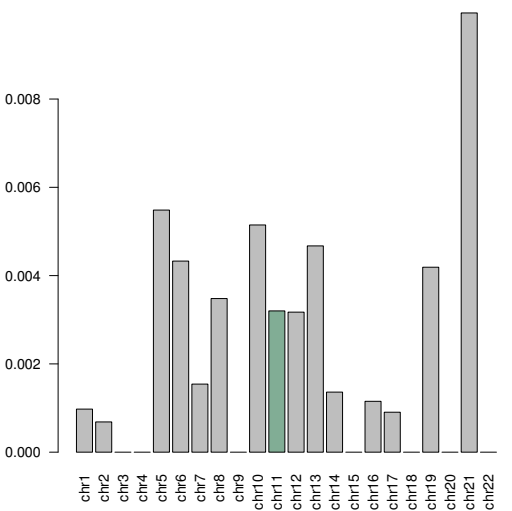**g**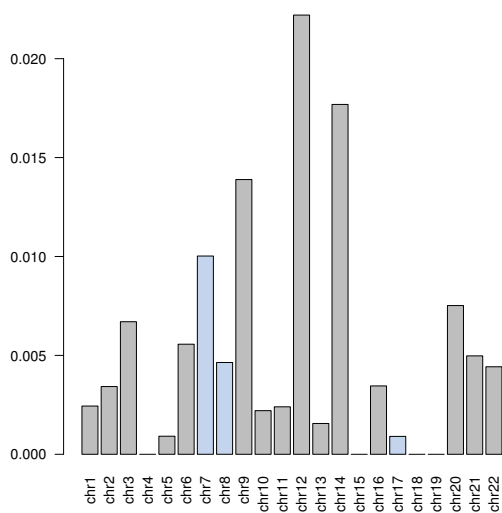**h**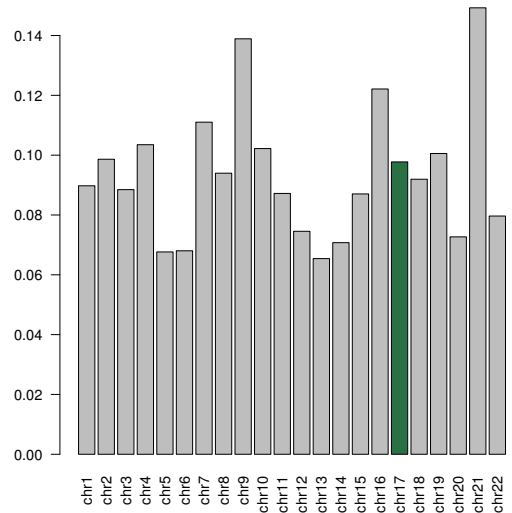

**Supplementary Figure 11: Subtype-specific differentially methylated loci are not enriched in corresponding significantly altered chromosomes.** For each subtype I-VIII, the chromosomal distribution of differentially methylated loci (mean change in beta value  $>0.3$ ,  $q_{val} < 0.0001$ ) is shown, relative to the overall number of testable CpG loci per chromosome. Significant, subtype-specific chromosomal alterations (i.e. gain/loss) are shown in the corresponding subtype colour. Chromosomes without significant copy number alterations in a subtype are shown grey.
